1           **THE GENOMIC ARCHITECTURE OF A RAPID ISLAND RADIATION:**  
2           **RECOMBINATION RATE VARIATION, CHROMOSOME STRUCTURE, AND**  
3           **GENOME ASSEMBLY OF THE HAWAIIAN CRICKET *LAUPALA***

4

5   **Thomas Blankers<sup>1</sup>, Kevin P. Oh<sup>1</sup>, Aureliano Bombarely<sup>2</sup>, Kerry L. Shaw<sup>1</sup>**

6

7   <sup>1</sup> *Department of Neurobiology and Behavior, Cornell University, Ithaca, NY, USA*

8   <sup>2</sup> *Department of Horticulture, Virginia Tech, Blacksburg, VA, USA*

9

10

11

12

13 **Running Title:** *Laupala* Genomic Architecture

14

15 **Key words:** speciation, sexual selection, recombination, chromosomal rearrangements, genome,

16 crickets

17

18

19 **Corresponding author:**

20 Thomas Blankers, Department of Neurobiology and Behavior, Cornell University, W319 215

21 Tower rd, 14850, Ithaca, NY, USA. [thomasblankers@gmail.com](mailto:thomasblankers@gmail.com). 1- (607) 254 4326

22

23

24 **ABSTRACT**

25 Phenotypic evolution and speciation depend on recombination in many ways. Within  
26 populations, recombination can promote adaptation by bringing together favorable mutations and  
27 decoupling beneficial and deleterious alleles. As populations diverge, cross-over can give rise to  
28 maladapted recombinants and impede or reverse diversification. Suppressed recombination due  
29 to genomic rearrangements, modifier alleles, and intrinsic chromosomal properties may offer a  
30 shield against maladaptive gene flow eroding co-adapted gene complexes. Both theoretical and  
31 empirical results support this relationship. However, little is known about this relationship in the  
32 context of behavioral isolation, where co-evolving signals and preferences are the major  
33 hybridization barrier. Here we examine the genomic architecture of recently diverged, sexually  
34 isolated Hawaiian swordtail crickets (*Laupala*). We assemble a *de novo* genome and generate  
35 three dense linkage maps from interspecies crosses. In line with expectations based on the  
36 species' recent divergence and successful interbreeding in the lab, the linkage maps are highly  
37 collinear and show no evidence for large-scale chromosomal rearrangements. The maps were  
38 then used to anchor the assembly to pseudomolecules and estimate recombination rates across  
39 the genome. We tested the hypothesis that loci involved in behavioral isolation (song and  
40 preference divergence) are in regions of low interspecific recombination. Contrary to our  
41 expectations, a genomic region where a male song QTL co-localizes with a female preference  
42 QTL was not associated with particularly low recombination rates. This study provides important  
43 novel genomic resources for an emerging evolutionary genetics model system and suggests that  
44 trait-preference co-evolution is not necessarily facilitated by locally suppressed recombination.

45

46

## 47 INTRODUCTION

48 Speciation is contingent on the accumulation of genomic variation and the formation of barriers  
49 that prevent gene flow between populations. Genomes diverge under the influence of selection  
50 and drift, while gene flow counteracts this divergence by homogenizing the genome (Felsenstein  
51 1981; Kirkpatrick and Ravigne 2002; Gavrillets 2003). To appreciate the speciation process and  
52 the origin of the fascinating diversity of life on earth, we need to understand the interaction  
53 between the mechanisms that change allele frequencies and the mechanisms that govern the  
54 association of beneficial and deleterious alleles with other alleles. A key process in this  
55 interaction is recombination, which creates new allelic combinations during meiosis in sexually  
56 reproducing organisms.

57 Any association between loci that underlie environmental adaptation or between loci underlying  
58 co-evolving (sexual) signals and signal responses (i.e. co-adapted gene complexes) will be  
59 affected by recombination (Felsenstein 1981). Within populations, recombination can mitigate  
60 Hill-Robertson interference by combining locally adaptive alleles from different genomic  
61 backgrounds and by decoupling beneficial and deleterious alleles (Hill and Robertson 1966);  
62 recombination can also influence the covariance between sexual traits and preference across  
63 sexes (Smith and Haigh 1974; Smith 1978; Gillespie 2000; Otto 2009). As such, recombination  
64 might increase the efficiency of background selection (purging deleterious alleles), sexual  
65 selection (through signal-preference co-evolution), and local adaptation in the earliest stages of  
66 speciation (by linking locally adapted alleles; Noor *et al.* 2001; Rieseberg 2001; Kirkpatrick and  
67 Ravigne 2002; Yeaman and Whitlock 2011).

68 Between divergent populations with some (but incomplete) reproductive isolation, recombination  
69 can also counteract population divergence and prevent the closure of a reproductive boundary by

70 creating combinations of alleles that are favorable in different contexts (Noor *et al.* 2001;  
71 Rieseberg 2001; Coyne and Orr 2004; Ortiz-Barrientos *et al.* 2016). It is important to realize that  
72 interspecific recombination is constrained both by intrinsic properties of the species' genomes  
73 that also constrain intraspecific recombination, as well as by the effects from (divergent)  
74 selection and alternatively fixed chromosomal rearrangements (Yeaman and Whitlock 2011;  
75 Feder *et al.* 2012). The most intensely studied chromosomal rearrangements suppressing  
76 recombination between divergent populations are inversions. Inversions can suppress  
77 recombination locally in the genome and, thus, promote reproductive isolation, by trapping  
78 genetic incompatibilities in linkage blocks (Noor *et al.* 2001), acting synergistically with other  
79 genes causing isolation (Rieseberg 2001), or by linking locally adaptive alleles (Kirkpatrick and  
80 Barton 2006). Other chromosomal rearrangements, such as translocations and transposable  
81 elements, can likewise contribute to 'chromosomal speciation' (Rieseberg 2001) as well as to  
82 preventing gene flow and furthering genetic divergence among heterospecifics.

83 Interestingly, there is ubiquitous among-species variation in recombination rates (Wilfert *et al.*  
84 2007; Smukowski and Noor 2011). In insects, for example, rates vary from 16.1 cM/Mb (centi-  
85 Morgans per megabase) in *Apis mellifera* to 0.1 cM/Mb in the mosquito *Armigeres subalbatus*  
86 (Wilfert *et al.* 2007). There is also variation across the genome within individuals. For example,  
87 50-fold differences have been observed within single chromosomes of humans and birds (Myers  
88 *et al.* 2005; Singhal *et al.* 2015). These patterns of variation underline that the efficacy of  
89 selection acting within species may differ across taxa and across genomes of the same species.

90 A major prediction following from theoretical work is that favorable allele combinations that  
91 promote ecological adaptation are more likely to reside in regions of low recombination.  
92 Recombination frustrates natural selection by breaking up associations between segregating

93 alleles that are locally adaptive within the resident population and counteracts divergent selection  
94 if there is gene flow between recently diverged populations (Bürger and Akerman 2011; Yeaman  
95 and Whitlock 2011; Yeaman 2013). So far, empirical evidence for the prediction that locally  
96 adaptive alleles reside in regions of low recombination is not conclusive (Roesti *et al.* 2013;  
97 Burri *et al.* 2015; Marques *et al.* 2016). However, a recent study indicated that the interaction  
98 between gene flow and divergent selection is a strong predictor for the association between  
99 adaptive alleles and regions of low recombination in multiple species of stickleback fish (Samuk  
100 *et al.* 2017).

101 However, it is unclear how these predictions apply to the evolution of behavioral isolation.  
102 Theoretical models of speciation by sexual selection depend on linkage disequilibrium between  
103 sexual signaling traits and corresponding preference genes (Fisher 1930; Lande 1981;  
104 Kirkpatrick 1982). Linkage disequilibrium between trait and preference genes can come about by  
105 assortative mating (Lande 1981; Andersson and Simmons 2006) or by physical linkage  
106 (Kirkpatrick and Hall 2004), either through closely linked loci or through pleiotropy (a single  
107 gene affecting both signal and preference phenotypes). Here, the role of recombination is more  
108 complex: On the one hand, recombination can help consolidate loci brought together by  
109 nonrandom mating and as such facilitate linkage disequilibrium between trait and preference  
110 (Kirkpatrick and Ravigne 2002). On the other hand, recombination can also tear apart co-adapted  
111 trait and preference alleles if genes are exchanged between populations that differ in mating  
112 phenotypes. Therefore, recombination between sexually divergent populations in sympatry and  
113 parapatry often compromises differentiation in mating phenotypes and hinders speciation  
114 (Arnegard *et al.* 2004; Servedio 2009, 2015; Servedio and Burger 2014). However, there has

115 been limited empirical insight into the relationship between trait-preference co-evolution and  
116 genome-wide variation in recombination rates (see Davey *et al.* 2017 for a recent exception).

117 Here, we examine the genomic architecture, specifically structural variation and heterogeneity in  
118 interspecific recombination, of four closely related, sexually isolated species of Hawaiian  
119 swordtail crickets from the genus *Laupala*. *Laupala* is one of the fastest speciating taxa known to  
120 date (Mendelson and Shaw 2005). The 38 morphologically cryptic species, each endemic to a  
121 single island of the Hawaiian archipelago (Otte 1994; Shaw 2000a) are the product of a recent  
122 evolutionary radiation. Evidence suggests that speciation by sexual selection on the acoustic  
123 communication system has driven this rapid diversification, as both male mating song and  
124 female acoustic preferences have diverged extensively among *Laupala* species (Otte 1994; Shaw  
125 2000b; Mendelson and Shaw 2002). Sexual trait evolution strongly contributes to the onset and  
126 maintenance of reproductive isolation (Mendelson and Shaw 2002; Grace and Shaw 2011).

127 Quantitative variation in one key temporal property of male song (pulse rate) and corresponding  
128 female preference strongly covaries across species and across populations within species (Shaw  
129 2000b; Grace and Shaw 2011). Although the mechanisms of trait-preference co-evolution require  
130 further study, there is evidence that both are associated with a polygenic basis and that genetic  
131 loci controlling quantitative variation in traits and preferences are physically linked in the  
132 genome (Shaw and Lesnick 2009; Wiley *et al.* 2012). Notably, one of the major song  
133 quantitative trait loci (QTL; haploid effect size ~ 9%) co-localizes with the first mapped  
134 preference QTL (haploid effect size ~ 14%). Directional effects of song QTL provide additional  
135 evidence that (sexual) selection is driving divergence between species (Shaw *et al.* 2007).

136 The species pairs involved in this study, *L. kohalensis* and *L. pruna*, and *L. paranigra* and *L.*  
137 *kona*, are endemic to the Big Island, the youngest island of the Hawaiian archipelago (Fig 1A,

138 B). Although these species pairs have apparently diverged in allopatry within the Big Island, past  
139 or future migration is likely, given their geographical proximity. Indeed, although allopatric and  
140 more closely related to *L. kohalensis*, *L. pruna* currently overlaps in distribution with *L.*  
141 *paranigra* (Fig 1B). The discordance between nuclear and mitochondrial phylogenies (Shaw  
142 2002) and the limited degree of postzygotic isolation between some species pairs further  
143 emphasize the possibility of gene flow across natural populations. Together, the biogeography  
144 and the genetics of song and preference variation in this system provide a unique opportunity to  
145 explore the interaction between interspecific recombination rate variation, co-evolution of  
146 mating traits, and speciation.

147 We first assemble a *de novo* *L. kohalensis* draft genome and then obtain thousands of SNP  
148 markers for heterogeneously hybrid offspring from three laboratory-generated interspecific  
149 crosses. We then generate three dense linkage maps and compare these maps to test the  
150 hypothesis that the genomic architectures of young, sexually differentiated species are largely  
151 collinear (similar marker order) and have conserved interspecific recombination frequencies  
152 (similar marker distances). There is some variation in the level of overall differentiation in the  
153 species pairs studied here, but all lineages are young (approximately 0.5 million years or less, Fig  
154 1). It is commonly expected that strong prezygotic isolation can evolve rapidly and largely in the  
155 absence of intrinsic postzygotic isolating mechanisms (Coyne and Orr 2004), but explicit  
156 comparisons of chromosomal architectures across behaviorally isolated species are rare. We  
157 compare the maps visually and use variation in marker order and length (measured in genetic  
158 distance, or centi-Morgans [cM]) as indicators of possible chromosomal rearrangements  
159 affecting the recombination rates differently in different crosses (Fig 1C). Then, from the large  
160 amount of information on linkage across many genomic markers from three hybrid crosses, we



161 anchor the draft genome assembly to pseudomolecules and estimate the landscape of  
162 recombination across the genome. Finally, using an additional map that integrates the amplified  
163 fragment length polymorphism (AFLP) markers from previous QTL studies in *L. kohalensis* and  
164 *L. paranigra*, we approximate the location of known male song QTL, including one co-localizing  
165 with a female acoustic preference QTL, on the pseudomolecules. We examine local variation in  
166 recombination rates across the genome and in relation to the location of the song and preference  
167 QTL to test the hypothesis that song-preference co-evolution is facilitated by suppressed  
168 interspecific recombination. This study provides important insight into the role of the genomic  
169 architecture during divergence of closely related species separated by premating barriers.

## 170 **MATERIAL & METHODS**

### 171 *De novo genome assembly*

172 The *Laupala kohalensis* draft genome (estimated genome size ~ 1.9 Gb; Petrov *et al.* 2000) was  
173 sequenced using the Illumina HiSeq 2500 platform. DNA was isolated with the DNeasy Blood &  
174 Tissue Kits (Qiagen Inc., Valencia, CA, USA) from six immature female crickets (c. five months  
175 of age) chosen randomly from a laboratory stock population (approximate lab generation=14).  
176 Females were chosen to balance DNA content of sex chromosomes to autosomes (female  
177 crickets are XX; male crickets are XO). DNA was subsequently pooled for sequencing. Four  
178 different libraries were created: a paired-end library with an estimated insert size of 200 bp  
179 (sequenced by Cornell Biotechnology Resource Center), a paired-end library with an estimated  
180 insert size of 500 bp, and two mate-pair libraries with insert sizes of 2 and 5 Kb (sequenced by  
181 Cornell Weill College Genomics Resources Core Facility).

182 Reads were processed using Fastq-mcf from the Ea-Utills package (Aronesty 2011) with  
183 the parameters -q 30 (trim nucleotides from the extremes of the read with qscore below 30) and -  
184 l 50 (discard reads with lengths below 50 bp). Read duplications were removed using PrinSeq  
185 (Schmieder and Edwards 2011) and reads were corrected using Musket with the default  
186 parameters (Liu *et al.* 2013).

187 Reads were assembled using SoapDeNovo2 (Luo *et al.* 2012). The reads were assembled  
188 using different Kmer sizes ( $k = 31, 39, 47, 55, 63, 71, 79$  and 87). The 87-mer assembly  
189 produced the best assembly (based on N50/L50, assembly size, and number of scaffolds).  
190 Scaffolds and contigs were renamed using an in-house Perl script. Gaps were filled using  
191 GapCloser from the SoapDeNovo2 package.

192 The gene space covered by the assembly was evaluated using three different approaches.  
193 (1) *Laupala kohalensis* unigenes produced by the Gene Index initiative (Cricket release 2.0:  
194 <http://compbio.dfci.harvard.edu/cgi-bin/tgi/gimain.pl?gudb=cricket>) were mapped using Blat  
195 (Kent 2002). Only unigenes mapping with 90% or more of their length were considered; (2) 50  
196 bp paired-end RNA-seq reads from a congeneric species, *L. cerasina* were mapped using  
197 Tophat2 (Kim *et al.* 2013). Reads were processed using the same methodology described above,  
198 but using a minimum length of 30 bp; (3) using BUSCO (Simão *et al.* 2015) to search for  
199 conserved eukaryotic and arthropod genes.

## 200 *Samples*

201 We generated three F<sub>2</sub> interspecies hybrid families to estimate genetic maps. Multiple F<sub>1</sub> male  
202 and sibling females were intercrossed to generate F<sub>2</sub> mapping populations for the following  
203 species crosses: (1) a *L. kohalensis* female and *L. paranigra* male (“ParKoh”, 178 genotyped F<sub>2</sub>

204 hybrid offspring; previously reported in Shaw et al. 2007); (2) a *L. kohlanesis* female and a *L.*  
205 *pruna* male (“PruKoh”, 193 genotyped F<sub>2</sub> hybrid offspring); (3) a *L. paranigra* female and a *L.*  
206 *kona* male (“KonPar”, 263 genotyped F<sub>2</sub> hybrid offspring). These four species are part of a  
207 recently radiated clade showing conspicuous mating song divergence (Mendelson and Shaw  
208 2005). Approximate geographic distributions of the species, phylogenetic relationships and  
209 parent collection localities are shown in Fig 1 and in Table S1. Crickets used in crosses were a  
210 combination of lab stock and outbred individuals (*L. kohalensis* [for ParKoh] and *L. paranigra*  
211 [for ParKoh and KonPar] were both lab reared for 3-15 generations; *L. kohalensis* [for PruKoh],  
212 *L. pruna* and *L. kona* were wild-caught). All parental and hybrid generations were reared in a  
213 temperature-controlled room (20°C) on Purina cricket chow and provided water *ad libitum*.

#### 214 *Genotyping*

215 DNA was extracted from whole adults using the DNeasy Blood & Tissue Kits (Qiagen, Valencia,  
216 CA, USA). Genotype-by-Sequencing library preparation and sequencing were done in 2014 at the  
217 Genomic Diversity Facility at Cornell University following Elshire *et al.* (2011). The Pst I  
218 restriction enzyme was used for sequence digestion and DNA was sequenced on the Illumina  
219 HiSeq 2500 platform (Illumina Inc., USA).

220 Reads were trimmed and demultiplexed using Flexbar (Dodt *et al.* 2012) and then mapped to the  
221 *L. kohalensis de novo* draft genome using Bowtie2 (Langmead and Salzberg 2012) with default  
222 parameters. We then called SNPs using two different pipelines: The Genome Analysis Toolkit  
223 (GATK; DePristo *et al.* 2011; Van der Auwera *et al.* 2013) and FreeBayes (Garrison and Marth  
224 2012). For GATK we used individual BAM files to generate gVCF files using ‘HaplotypeCaller’  
225 followed by the joint genotyping step ‘GenotypeGVCF’. We then evaluated variation in SNP  
226 quality across all genotypes using custom R scripts to determine appropriate settings for hard

227 filtering based on the following metrics (based on the recommendations for hard filtering section  
228 “Understanding and adapting the generic hard-filtering recommendations” at  
229 <https://software.broadinstitute.org/gatk/> accessed on 28 February 2017): quality-by-depth, Phred-  
230 scaled  $P$ -value using Fisher’s Exact Test to detect strand bias, root mean square of the mapping  
231 quality of the reads, u-based z-approximation from the Mann-Whitney Rank Sum Test for  
232 mapping qualities, u-based z-approximation from the Mann-Whitney Rank Sum Test for the  
233 distance from the end of the read for reads with the alternate allele. For FreeBayes we called  
234 variants from a merged BAM file using standard filters. After variant calling we filtered the  
235 SNPs using ‘vcffilter’, a Perl library part of the VCFtools package (Danecek *et al.* 2011) based  
236 on the following metrics: quality ( $> 30$ ), depth of coverage ( $> 10$ ), and strand bias for the  
237 alternative and reference alleles (SAP and SRP, both  $> 0.0001$ ). Finally, the variant files from the  
238 GATK pipeline and the FreeBayes pipeline were filtered to only contain biallelic SNPs with less  
239 than 10% missing genotypes using VCFtools.

240 We retained two final variant sets: a high-confidence set including only SNPs with identical  
241 genotype calls between the two variant discovery pipelines and the full set of SNPs which  
242 included all variants called using FreeBayes but limited to positions that were shared among the  
243 GATK and FreeBayes pipelines.

#### 244 *Linkage mapping*

245 The genotype information from the parental lines was used to assign ancestry to the SNP loci.  
246 The parents of the crosses were heterogeneously heterozygous and only ancestry informative loci  
247 were retained, i.e. all loci for which one or more of the parents was heterozygous were discarded.  
248 We were unable to obtain sequence data from the parents for PruKoh, but used sequence data  
249 from a single, non-parental *L. pruna* female, and three available *L. kohalensis* females, all from

250 the same populations as the parents. Ancestry was inferred if all three *L. kohalensis* individuals  
251 were homozygous for one allele and the *L. pruna* individual was homozygous for the alternative  
252 allele. All other loci were discarded. The loci were then further filtered based on genotype  
253 similarity and segregation distortion (see below for details).

254 The linkage maps deriving from the three species crosses were generated independently  
255 and by taking a three-step approach, employing both the regression mapping and the maximum  
256 likelihood (ML) mapping functions in JoinMap 4.0 (van Ooijen 2006) as well as the three-point  
257 error-corrected ML mapping function in MapMaker 3.0 (Lander *et al.* 1987; Lincoln *et al.* 1993).

258 In the first step, we estimated “initial” maps that are relatively low resolution (5 cM) but  
259 with high marker order certainty. For initial maps, we first grouped ( $3.0 \leq \text{LOD} \leq 5.0$ ) and then  
260 ordered the high-confidence markers that showed no segregation distortion (markers with  $\chi^2$ -  
261 square associated *P*-value for deviation from Mendelian inheritance  $< 0.05$  were discarded) and  
262 for which no marker had more than 95% similarity in genotypes across individuals compared to  
263 other markers (otherwise, one of each pair was excluded). When excluding similar loci, we  
264 favored those marker loci shared among the three mapping populations over markers unique to  
265 one or two crosses. We then checked for concordance among the three mapping algorithms. In  
266 most cases, the maps were highly concordant (in ordering of the markers; with respect to cM  
267 among markers, distances differed depending on the algorithm, especially between the regression  
268 and ML methods in JoinMap). Discrepancies among the maps produced by the different  
269 algorithms for the same cross were resolved by optimizing the likelihood and total length of a  
270 given map as well as by using the information in JoinMap’s “Genotype Probabilities” and  
271 “Plausible Positions”.

272           These initial maps were then filled out using MapMaker with marker loci passing slightly  
273 more lenient criteria: markers drawn from the full set of SNPs, with false discovery rate  
274 (Benjamini and Hochberg 1995) corrected  $P$  value for  $\chi^2$ -square test of deviation from  
275 Mendelian inheritance  $\leq 0.05$  and fewer than 99% of their genotypes in common with other  
276 markers loci. First, more informative markers (no missing genotypes,  $> 2.0$  cM distance from  
277 other markers) were added satisfying a log-likelihood threshold of 4.0 for the positioning of the  
278 marker (i.e., assigned marker position is 10,000 times more likely than any other position in the  
279 map). Remaining markers were added at the same threshold, followed by a second round for all  
280 markers at a log-likelihood threshold of 3.0. We then used the ripple algorithm on 5-marker  
281 windows and explored alternative orders.

282           In the second step, “comprehensive” maps were obtained in MapMaker by sequentially  
283 adding markers from the full set of SNPs that met the more lenient criteria described above to the  
284 initial map. Markers were added if they satisfied a log-likelihood threshold of 2.0 for the marker  
285 positions, followed by a second round with a log-likelihood threshold of 1.0. We then used the  
286 ripple algorithm again on 5-marker windows and explored alternative orders. Typically,  
287 MapMaker successfully juxtaposes SNP markers from the same scaffold. However, in marker  
288 dense regions with low recombination rates, the likelihoods of alternative marker orders  
289 coalesce. In such regions, when multiple markers from the same genomic scaffold were  
290 interspersed by markers from a different scaffold, we repositioned the former markers by forcing  
291 them in the map together. If the log-likelihood of the map decreased by more than 3.0 (factor  
292 1000), only one of the markers from that scaffold was used in the map. The comprehensive maps  
293 provide a balance between marker density and confidence in marker ordering and spacing.

294           The third step was to create “dense” maps. We added all remaining markers that were not  
295 yet incorporated in step two, first at a log-likelihood threshold of 0.5, followed by another round  
296 at a log-likelihood threshold of 0.1. We then used the ripple command as described above. The  
297 dense maps are useful for anchoring of scaffolds and for obtaining the highest possible resolution  
298 of variation in recombination rates, but with the caveat that there is some uncertainty in marker  
299 order. Uncertainty is expected to be higher towards the centers of the linkage groups where  
300 crossing over events between adjacent markers become substantially less frequent (see Results).

### 301 *Comparative analyses*

302 Based on the recent divergence times and high interbreeding successes, we predict a large degree  
303 of collinearity of the linkage maps. We note that interpretations must take into account the non-  
304 independence of the ParKoh and PruKoh/KonPar maps, as only comparing PruKoh and KonPar  
305 comprises a fully independent contrast. We first examined whether inversions or other  
306 chromosomal rearrangements were common (affecting linkage map lengths and marker orders)  
307 or whether maps were generally collinear by comparing among the initial and comprehensive  
308 linkage maps visually using map graphs from MapChart (Voorrips 2002). Inverted or transposed  
309 markers present in two or all maps can be detected by connecting “homologs” in MapChart (a  
310 homolog in this case means a scaffold that is represented in two or more maps). Then, we tested  
311 whether linkage maps are generally collinear across the species pairs quantitatively. We used  
312 Spearman’s rank order correlation ( $\rho$ ) test to examine the strength of correlation between the  
313 order in shared markers (the homologs in MapChart). We calculated  $\rho$  and the corresponding  $P$ -  
314 value (the probability of observing the measured or stronger correlation given no true correlation  
315 exists) by using the `cor.test()` function in R (R Development Core Team 2016).

316 We then tested for genetic incompatibilities among the genomes of the four species, by  
317 measuring segregation distortion in sliding, 10 cM windows. Although we filtered out markers  
318 with very high levels of segregation distortion (using a 5% FDR cutoff) to purge markers with  
319 potential sequencing errors, groups of distorted markers in a single region of a linkage group  
320 represent genomic regions with biased parental allele contributions, suggesting genetic  
321 incompatibilities (or, less common, selfish alleles and other active segregation distorters).  
322 Because *L. kohalensis* and *L. paranigra* are more distantly related to each other (and, thus,  
323 allowing more time for genetic incompatibilities to accumulate) than they are to *L. pruna* and *L.*  
324 *kona*, respectively (Mendelson and Shaw 2005; see Fig 1.), we expected more regions with  
325 significant segregation distortion in the ParKoh map relative to the KonPar and PruKoh maps.  
326 We calculated genotype frequency and the negative 10-base logarithm of the  $P$  value for the  $\chi^2$ -  
327 square test of deviation from Mendelian inheritance across the linkage groups in R using the  
328 R/qtl package (Broman *et al.* 2003). Windows with  $P < 0.01$  were considered to have significant  
329 segregation distortion, and thus potentially reflecting genetic incompatibilities.

330 After establishing that the linkage maps were generally collinear (see Results), we merged the  
331 maps and examined patterns of variation in crossing over along the *Laupala* genome. Maps were  
332 consolidated using ALLMAPS (Tang *et al.* 2015). Then, we calculated species-specific average  
333 recombination rates for the linkage groups by dividing the total length of the linkage group (in  
334 cM) by the physical length of the pseudomolecule (in million bases, Mb) obtained by merging  
335 homologous linkage groups using ALLMAPS. Lastly, to evaluate recombination rate variation  
336 along the linkage groups, we fitted smoothing splines (with 10 degrees of freedom, based on the  
337 fit of the spline to the observed data) in R to describe the relationship between the consensus  
338 physical distance (as per the anchored scaffolds) and the genetic distance specific to each linkage



339 map. Variation in the recombination rate was then assessed by taking the first derivative (i.e. the  
340 rate) of the fitted spline function. The estimated recombination rates are likely to be an  
341 overestimate of the true recombination rate, because unplaced/unordered parts of the assembly  
342 do not contribute to the physical length of the pseudomolecules but are reflected in the genetic  
343 distances obtained from crossing-over events in the recombining hybrids.

344 To test the hypothesis that linked trait and preference genes reside in low recombination  
345 regions, we integrated the AFLP map and song and preference QTL peaks identified in previous  
346 work on *L. kohalensis* and *L. paranigra* (Shaw and Lesnick 2009) with the current ParKoh SNP  
347 map and projected the QTL peaks onto the anchored genome. The SNPs used in the present  
348 study were obtained from the same mapping population (same individuals) as in the 2009 AFLP  
349 study. Therefore, we combined the high confidence SNPs described above (for the “initial” map)  
350 with the AFLP markers reported in (Shaw *et al.* 2007) that were of the same individuals as the  
351 SNP markers used in this study and created a new linkage map using the same stringent criteria  
352 as for the “initial” maps described above. We projected this map onto the anchored draft genome  
353 based on common markers (scaffolds). We then approximated the physical location of the QTL  
354 peaks by looking for SNP markers on scaffolds present in the draft genome flanking AFPL  
355 markers underneath the QTL peaks identified in the 2009 study.

## 356 **DATA ACCESSIBILITY**

357 Supplementary files are available on FigShare. See section “supplementary materials” for details.  
358 Raw data (vcf files, linkage maps, pseudomolecule agp file), and R-scripts will be deposited on  
359 FigShare after final acceptance and are available upon request. The genome assembly and  
360 sequencing reads are available on NCBI’s GenBank under BioProject number PRJNA392944.

361 The Genotype-by-sequencing reads will be made available in NCBI's short read archive under  
362 BioProject number PRJNA429815

## 363 RESULTS

### 364 *De novo genome assembly*

365 The sequencing of the four libraries yielded 162.5 Gb of raw sequences (Table 1). After read  
366 processing, 145.5 Gb was used for the sequence assembly. We compared among assemblies  
367 resulting from different Kmer sizes ( $k = 31, 39, 47, 55, 63, 71, 79$  and  $87$ ). Based on the  
368 N50/L50 and the total assembly size, the assembly produced with  $k = 87$  was retained for the  
369 final draft genome. Despite a large number of scaffolds in the final assembly (149,424), the  
370 median length of the scaffolds was high and the total length of the assembly covers about 83% of  
371 the expected complete genome in *Laupala*.

372 Gene space coverage in the assembly was evaluated using the *L. kohalensis* cricket gene  
373 index (Danley *et al.* 2007) (release 2.0), RNASeq from *Laupala cerasina* (Blankers *et al.* 2018),  
374 and by performing a BUSCO search using eukaryotic and arthropod specific conserved genes.  
375 Respectively 95% and 92% of the *Laupala* gene index and RNAseq sequences mapped to the  
376 current genome. In addition, the BUSCO search indicated very few missing genes in either  
377 database (Table 1).

378  
379 Table 1. *Laupala kohalensis* sequencing, assembly and gene space evaluation statistics.

380

| Sequencing Statistics<br>Library | Raw data  |                       | Processed data |                       |
|----------------------------------|-----------|-----------------------|----------------|-----------------------|
|                                  | Size (Gb) | Coverage <sup>a</sup> | Size (Gb)      | Coverage <sup>a</sup> |
| Paired End 0.2 Kb inserts        | 28.9      | 15                    | 26.1           | 14                    |

|                           |              |           |              |           |
|---------------------------|--------------|-----------|--------------|-----------|
| Paired End 0.5 Kb inserts | 63.1         | 33        | 59.8         | 31        |
| Mate Pair 2 Kb inserts    | 36.2         | 19        | 31.8         | 17        |
| Mate Pair 5 Kb inserts    | 34.3         | 18        | 27.8         | 14        |
| <b>Total</b>              | <b>162.5</b> | <b>85</b> | <b>145.5</b> | <b>76</b> |

| <b>Assembly Statistics</b>   | <b>Contigs</b> | <b>Scaffolds</b> |
|------------------------------|----------------|------------------|
| Total assembly size (Gb)     | 1.6            | 1.6              |
| Total assembled sequences    | 219,073        | 148,874          |
| Longest sequence length (Kb) | 465            | 4,541            |
| Average sequence length (Kb) | 7.2            | 10.7             |
| N90 index <sup>b</sup>       | 40,926         | 3,505            |
| N90 length (Kb)              | 7.7            | 67.7             |
| N50 index                    | 9,917          | 756              |
| N50 length (Kb)              | 43.6           | 583              |
| GC content (%)               | 34.9%          | 34.9%            |

| <b>Gene Space Statistics</b>                | <b>Mapping percentage</b> |
|---------------------------------------------|---------------------------|
| <i>Laupala</i> unigenes from the Gene Index | 95%                       |
| <i>Laupala</i> RNASeq reads                 | 92%                       |

| <b>BUSCO database</b> | <b>Complete</b> | <b>Single copy</b> | <b>Duplicated</b> | <b>Fragmented</b> | <b>Missing</b> | <b>Total</b> |
|-----------------------|-----------------|--------------------|-------------------|-------------------|----------------|--------------|
| Eukaryota_odb9        | 98.7%           | 93.7%              | 5.0%              | 0.3%              | 1.0%           | 303          |
| Arthropoda_odb9       | 99.3%           | 96.8%              | 2.5%              | 0.1%              | 0.6%           | 1066         |

381

382 <sup>a</sup>Coverage is based in an estimated genome size of 1.91 Gb (Petrov *et al.* 2000)

383 <sup>b</sup>When ordering all contigs (or scaffolds) by size, the N50 or N90 index indicates the number of the  
384 longest sequences (contigs or scaffolds) that contain 50% or 90%, respectively, of the total assembled  
385 sequence. The N50 and N90 length indicate the length of the shortest sequence in the set of the largest  
386 contigs (or scaffolds) that contain 50% or 90%, respectively, of all the sequence in the assembly.

387

388 *Collinear linkage maps*

389 We obtained 815,109,126; 522,378,849; and 311,558,401 reads after demultiplexing for ParKoh,

390 KonPar, and PruKoh, respectively. Average sequencing depth  $\pm$  standard deviation across all

391 individuals in the F2 mapping population after filtering, (before and) after marker selection based  
392 on segregation distortion and ancestry information for linkage mapping was  $(62.4 \times \pm 162.5)$   
393  $52.2 \times \pm 31.4$ ,  $(44.3 \times \pm 58.5)$   $38.1 \times \pm 23.8$ , and  $(56.1 \times \pm 105.7)$   $41.8 \times \pm 29.3$ , respectively.

394 In the initial maps, 158 (ParKoh), 170 (KonPar), and 138 (PruKoh) markers were grouped into  
395 eight linkage groups at a LOD score of 5.0, corresponding to the seven autosomes and one X-  
396 chromosome in *Laupala*. The corresponding marker spacing was 5.14, 4.85, and 7.33 cM. The  
397 comprehensive maps contained 526, 650, and 325 markers with an average marker spacing of  
398 1.91, 1.37, and 3.25 cM and on the dense maps we placed 608, 823, and 383 markers with on  
399 average 1.69, 1.37, and 3.25 cM. between markers

400 The recent divergence times and the limited levels of post-zygotic isolation observed in this  
401 system led us to hypothesize that the linkage maps would show a high degree of collinearity. The  
402 visual comparison of marker positioning showed that the relative locations of shared scaffolds  
403 were similar across the linkage maps in both the initial and the comprehensive maps (Fig 2, Fig  
404 S1). However, we also observe substantial variation in the total genetic length of homologous  
405 linkage groups, indicating recombination rate variation (Fig 2, Fig S1). This variation may in  
406 part result from chromosomal rearrangements. However, we can only reliably detect  
407 rearrangements in our maps if they are not segregating within species *and* are fixed for  
408 alternative arrangements between *L. pruna* and *L. kohalensis* on the one side and *L. paranigra*  
409 and *L. kona* on the other side. In that specific scenario the inverted marker order is visible when  
410 contrasting the PruKoh and KonPar maps, while the ParKoh map would show reduced  
411 recombination in that area (Fig 1C). Despite the apparent variation in recombination rates among  
412 homologous linkage groups, Spearman's rank correlation of pairwise linkage group comparisons  
413 was high ( $\rho$  varied between 0.91 and 1.00) and similar to values seen in comparisons of

414 intraspecific linkage maps (e.g. Poursarebani *et al.* 2013); the quantitative measure of  
415 collinearity was largely consistent across linkage groups and across cross types (Table 2).  
416 Finally, merging the maps into a consensus pseudomolecule assembly allowed us to measure the  
417 error between individual maps and the merged assembly. Correlations between linkage maps and  
418 the pseudomolecule assembly were generally high ( $> 0.95$ ), indicating substantial synteny (Fig  
419 S2).

420

421 Table 2. Linkage map comparison. Spearman's rank correlation ( $\rho$ ) is shown for each pairwise  
422 comparison of linkage maps across all 8 linkage groups.

---

|   | ParKoh ~ KonPar | ParKoh ~ PruKoh | KonPar ~ PruKoh |
|---|-----------------|-----------------|-----------------|
| 1 | 0.99‡           | 0.90‡           | 0.97‡           |
| 2 | 0.99‡           | 0.96‡           | 0.93‡           |
| 3 | 1.00‡           | 0.98‡           | 0.95‡           |
| 4 | 0.99‡           | 1.00‡           | 0.97‡           |
| 5 | 0.97‡           | 0.98‡           | 0.95‡           |
| 6 | 0.99‡           | 0.94‡           | 0.94‡           |
| 7 | 0.96‡           | 0.93†           | 0.91‡           |
| X | 0.92‡           | 0.96‡           | 0.99‡           |

---

423 \*  $P < 0.01$ ; †  $P < 0.001$ ; ‡  $P < 0.0001$

#### 424 *Limited heterogeneity in segregation distortion*

425 We expected genetic incompatibilities to be more likely to occur in the ParKoh cross than in the  
426 KonPar and PruKoh cross, because *L. kohalensis* and *L. paranigra* are more distantly related  
427 than any of the other species pairs (Fig 1). We tested this hypothesis by examining the degree of  
428 segregation distortion in markers within 10 cM sliding windows across the linkage maps.  
429 Overall, segregation distortion was limited and average genotype frequencies were close to

430 Mendelian expectations (Fig 3). However, LG3 showed a bias against *L. kohalensis*  
431 homozygotes in the ParKoh cross but not in any of the other crosses. Additionally, there was  
432 significant variation in the frequency of heterozygotes across the linkage groups (linear model  
433  $\text{Freq}[\text{heterozygotes}] \sim \text{LG} \times \text{cross}$ :  $R^2 = 0.21$ ,  $F_{20,1547} = 20.7$ ,  $P < 0.0001$ ). Post-hoc Tukey Honest  
434 Significant Differences revealed that linkage group 7 had the lowest abundance of heterozygotes  
435 overall and within each of the intercrosses and that levels of heterozygosity on LG 7 were similar  
436 across the maps (Table S2). Together, these results show that from some LGs and in some  
437 crosses, certain genotype combinations were less common than expected, potentially as a result  
438 for genetic incompatibilities or meiotic drive.

#### 439 *Variable recombination rates across the genome*

440 We anchored a total of 1054 scaffolds covering 720 million base pairs, a little below half the  
441 current genome assembly (see Table S3 for scaffold number, N50, and assembly size per LG and  
442 Fig S3 for coverage variation across the linkage groups). This gives us enough power to make  
443 inferences about broad-scale recombination rate variation, but not about the existence of small-  
444 scale recombination hotspots. Average recombination rates (cM/Mb) varied from between 0.75  
445 (KonPar) and 0.93 (ParKoh) on the X chromosome to between 3.12 (KonPar) and 4.24 (PruKoh)  
446 on LG6 (Table 3). We note that the recombination rate for LG6 might be artificially inflated  
447 because of lower assembly quality (expressed as N50) of this LG relative to the other LGs in all  
448 linkage maps and in the pseudochromosomes (Table S3). Both including and excluding the sex  
449 chromosome, there is a significant linear relationship between chromosome size and genetic  
450 length (linear mixed effect model with cross as random variable; With X:  $\beta = 0.62$ ,  $F_{1,23} = 14.95$ ,  
451  $P = 0.0008$ ; without X:  $\beta = 0.69$ ,  $F_{1,20} = 29.7$ ,  $P < 0.0001$ ) and between chromosome size and

452 broad-scale recombination rate (with X:  $\beta = -34.1$ ,  $F_{1,23} = 29.1$ ,  $P < 0.0001$ ).; without X:  $\beta = -$   
453 24.0,  $F_{1,23} = 63.7$ ,  $P < 0.0001$ ).

454 Table 3. Linkage map summary statistics.

| LG           | Length<br>(Mb) | ParKoh             |                      | KonPar             |                      | PruKoh             |                      |
|--------------|----------------|--------------------|----------------------|--------------------|----------------------|--------------------|----------------------|
|              |                | Map length<br>(cM) | Rec. Rate<br>(cM/Mb) | Map length<br>(cM) | Rec. Rate<br>(cM/Mb) | Map length<br>(cM) | Rec. Rate<br>(cM/Mb) |
| 1            | 117            | 207                | 1.77                 | 156                | 1.33                 | 156                | 1.33                 |
| 2            | 102            | 167                | 1.64                 | 128                | 1.25                 | 205                | 2.01                 |
| 3            | 137            | 169                | 1.23                 | 167                | 1.22                 | 173                | 1.26                 |
| 4            | 90             | 100                | 1.11                 | 117                | 1.30                 | 99                 | 1.10                 |
| 5            | 62             | 91                 | 1.47                 | 84                 | 1.35                 | 103                | 1.66                 |
| 6            | 25             | 85                 | 3.40                 | 106                | 4.24                 | 78                 | 3.12                 |
| 7            | 53             | 78                 | 1.47                 | 84                 | 1.58                 | 139                | 2.62                 |
| X            | 134            | 124                | 0.93                 | 101                | 0.75                 | 114                | 0.85                 |
| <b>Total</b> | <b>720</b>     | <b>1021</b>        | <b>1.42</b>          | <b>943</b>         | <b>1.31</b>          | <b>1067</b>        | <b>1.48</b>          |

455

456 Most linkage groups showed wide regions of strongly reduced recombination rates in the center  
457 of the linkage groups (Fig. 4). The general pattern of peripheral peaks in recombination rates  
458 juxtaposing large recombination “desserts” was similar among the three intercroses, but some  
459 additional cross-specific peaks in recombination rates were observed on almost all linkage  
460 groups (Fig 4).

461 *Trait-preference co-evolution despite high recombination*

462 Contrary to our expectation, the approximate location of the colocalizing song and preference  
463 QTL peak from (Shaw and Lesnick 2009) was associated with average recombination rates in the  
464 ParKoh and KonPar map and low recombination rates in the PruKoh map (Fig 4; Table S4).  
465 However, most other QTL peaks are located in regions of low recombination (Fig 4; Table S4).

466 **DISCUSSION**

467 The evolutionary trajectory of diverging populations and the likelihood of speciation can be  
468 heavily influenced by recombination. Within species, recombination can create favorable  
469 combinations of alleles or decouple deleterious from beneficial alleles. Among species, regions  
470 with low recombination can provide a genetic shield against introgression of maladaptive loci  
471 (Noor *et al.* 2001; Rieseberg 2001; Butlin 2005; Slatkin 2008; Noor and Bennett 2009; Cutter  
472 and Payseur 2013; Ortiz-Barrientos *et al.* 2016). Understanding recombination is thus critical to  
473 understanding adaptation and speciation. Recombination also has important implications for the  
474 analysis of genotype-phenotype relationships (Mackay 2001), demographic inference (Li and  
475 Durbin 2011), and analyses of genomic variation (Cutter and Payseur 2013; Wolf and Ellegren  
476 2016). However, we still have limited insight into the patterns of recombination rate variation  
477 among species and across genomes, in particular for radiations powered largely by behavioral  
478 isolation.

479 Here, we study four species of sexually divergent Hawaiian swordtail crickets and generate the  
480 first pseudomolecule-level assembly for Orthoptera and the first published genome assembly for  
481 crickets, an important model system in neurobiology, behavioral ecology, and evolutionary  
482 genetics (Horch *et al.* 2017). Below, we discuss how our results provide insight into the potential  
483 for structural variation (linkage map collinearity) and genetic incompatibilities to drive  
484 reproductive isolation among closely related *Laupala* species. We also elaborate on the patterns  
485 of variation in recombination rates across the genome. We then discuss the surprising finding  
486 that colocalizing male song and female preference QTL did not fall in a region with particularly  
487 low recombination. This is important because it challenges the hypothesis that co-evolution of  
488 traits and preferences is facilitated by locally reduced recombination between recently diverged  
489 populations.



## 490 *Collinearity of Genetic Maps*

491 Based on the recent divergence (Mendelson and Shaw 2005) and strong premating isolation of  
492 *Laupala* species in the absence of conspicuous morphological and ecological differences (Otte  
493 1994; Shaw 1996; Mendelson and Shaw 2005), we expected limited variation in chromosome  
494 structure and few signatures of genetic incompatibility between the species. In line with these  
495 expectations, we found that linkage groups are collinear across interspecies crosses (Fig 2). This  
496 was true both for comparisons of non-independent species pairs (between ParKoh and the other  
497 two crosses), as well as for the independent contrast of the PruKoh map versus the KonPar map.  
498 We saw some instances where markers occupied regions that may have been translocated or  
499 inverted. However, these instances were rare (Fig 2, Fig S1) and recombination rates were  
500 similar among homologous linkage groups across the hybrid families (Fig 4). Moreover,  
501 quantitative measures of correlation (Spearman's rank correlation among maps, Pearson's  
502 correlation coefficient between maps and the pseudomolecule assembly) as well as limited  
503 segregation distortion (but see discussion of one exception below) both supported the collinearity  
504 hypothesis.

505 Variation in the organization and structure of chromosomes can contribute to postzygotic  
506 reproductive isolation after speciation as well as to the speciation process directly (Noor *et al.*  
507 2001; Rieseberg 2001). We conclude that at least for the *Laupala* group that radiated on the Big  
508 Island of Hawaii in the last 500,000 years, structural rearrangements have not played a major  
509 role in the evolution of reproductive isolation. This is because, similar to two hybridizing  
510 *Heliconius* species (Davey *et al.* 2017), we observed that chromosome-wide recombination rates  
511 are relatively conserved and large chromosomal rearrangements are absent. We hypothesize that  
512 for *Laupala* on the Big Island premating isolation combined with (partial) geographic separation

513 (i.e. low migration rates) provides a sufficiently strong barrier to gene flow between sister  
514 species. Indeed, as has been shown in recent models of the role of inversions in speciation,  
515 genomic rearrangements can only invade and spread in diverging populations if levels of gene  
516 flow and the contribution of structural variation to isolation (by linking adaptive alleles or  
517 incompatibilities) is high relative to the strength of assortative mating (Feder *et al.* 2014; Dagilis  
518 and Kirkpatrick 2016).

519 We acknowledge that the power to detect rearrangements and changes in recombination rates is  
520 limited by the resolution of our maps. The average spacing of markers is between 1.37 and 3.25  
521 cM. Thus, the upper limit of the magnitude of intervals within which we can detect  
522 rearrangements is on the order of  $10^5$  and  $10^6$  bp. Due to constraints on the sample size and  
523 sequencing strategy, it is thus difficult to attribute subtle variation in marker order and genetic  
524 distance between the maps to genomic rearrangements versus mapping errors and sampling  
525 variance. Closely related organisms typically show conserved recombination rates within 500 kb  
526 intervals; more heterogeneity might be revealed at higher resolution (Stevison *et al.* 2017).

### 527 *Genetic incompatibilities*

528 We expected genetic incompatibilities to be more likely between genomes of more distantly  
529 related species. Accordingly, we discovered a single region covering approximately half of  
530 linkage group 3 with high segregation distortion in ParKoh; we found no such deviations in the  
531 other two crosses (Fig 3). Inspection of genotype frequencies indicated that there were fewer  
532 individuals than expected that were homozygous for *L. kohalensis* alleles for loci in this region.  
533 In a controlled cross, segregation distortion can be caused by prezygotic effects such as meiotic  
534 drive of selfish genetic elements and distorter genes (e.g. like *sd* in *Drosophila melanogaster*  
535 (Larracuenta and Presgraves 2012)), and by postzygotic genetic incompatibilities (Dobzhansky

536 1937; Muller 1942; Burt and Trivers 2006; Presgraves 2010; Hallmann *et al.* 2017). Genotypic  
537 errors may produce superficially similar patterns but are unlikely to distort segregation over large  
538 genomic regions and with consistent bias towards the same genotypes. Although meiotic drive is  
539 a possible alternative to genetic incompatibilities, we do not see the same effect in the other cross  
540 involving *L. paranigra*, where selfish genetic elements or segregation distorters ought to have a  
541 similar effect. Overall, the large region on linkage group 3 reveals a potential local post-mating  
542 barrier to gene flow that could contribute to strengthening existing prezygotic barriers in  
543 secondary contact zones or following episodes of migration.

#### 544 *Recombination landscape*

545 Chromosomal rearrangements influence genomic divergence by locally altering recombination  
546 rates within and among species. Felsenstein (1974, 1981) illuminated the role of *intraspecific*  
547 recombination in purging deleterious alleles and the role of *interspecific* recombination in  
548 decoupling co-adapted alleles. In recent years, the role of recombination and its interaction with  
549 divergent selection and adaptation on genomic scales have received considerable attention (e.g.  
550 Yeaman and Whitlock 2011; Feder *et al.* 2012; Samuk *et al.* 2017) and technological advances  
551 are shifting focus towards characterizing the recombination landscape across species (Butlin  
552 2005; Slatkin 2008; Noor and Bennett 2009; Barb *et al.* 2014; Burri *et al.* 2015).

553 Here, we show that there is limited variation in recombination rates across the maps of three  
554 interspecific crosses (Fig 4), but strong heterogeneity in recombination rates across the genome.  
555 Genome-wide average interspecific recombination rate varied between 1.3 and 1.5 cM/Mb  
556 (Table 3), similar to intraspecific rates observed in dipterans and substantially lower than social  
557 hymenopterans and lepidopterans (Wilfert *et al.* 2007). We note that our estimates are derived  
558 from interspecific maps, which may lead to somewhat lower estimates compared to intraspecific

559 maps (e.g. Beukeboom *et al.* 2010), where genetic incompatibilities and rearrangements may  
560 reduce rates of crossing over; however, differences between intra and interspecific recombination  
561 might be negligible if rearrangements are rare (e.g., Davey *et al.* 2017). Moreover, we anchored  
562 about 50% of the nucleotides in the draft assembly to linkage groups, and there remain many  
563 scaffolds not mapped to a genomic position. These ‘missing’ scaffolds are expected to add to the  
564 physical length of the chromosomes more so than to the genetic length of the chromosomes, thus  
565 lowering the recombination rate. However, our study emphasized relative patterns of  
566 recombination, which should not be affected by our sampling. And while we can only  
567 approximate intraspecific recombination rates at this point, we note that recent divergence of the  
568 species involved and collinearity of the linkage maps support conservation of recombination  
569 landscapes across intraspecific and interspecific comparisons.

570 Interestingly, for all three species pairs we document high variability in interspecific  
571 recombination across genomic regions. We found large regions of low recombination in all three  
572 maps, with recombination rates well below 1 cM/Mb and occasionally approaching zero, flanked  
573 by steep inclines reaching rates up to 6 cM/Mb (Fig 4). This pattern is consistent with earlier  
574 findings in plants (Anderson *et al.* 2003), invertebrates (Rockman and Kruglyak 2009; Niehuis *et*  
575 *al.* 2010), and vertebrates (Backström *et al.* 2010; Roesti *et al.* 2013; Singhal *et al.* 2015), but  
576 differs from observations in, for example, *Drosophila* (Kulathinal *et al.* 2008) and humans  
577 (Myers *et al.* 2005), that show heterogeneity in recombination rates, but not necessarily much  
578 higher rates on the periphery of the chromosomes. Commonly invoked drivers of local  
579 recombination suppression, such as selection against recombination due to negative epistasis or  
580 the maintenance of linkage disequilibrium between mutually beneficial alleles (Smukowski and  
581 Noor 2011; Stevison *et al.* 2011; Smukowski Heil *et al.* 2015; Ortiz-Barrientos *et al.* 2016), are

582 not likely to leave chromosome wide signatures. Rather, the observed pattern is more likely  
583 attributable to structural properties of chromosomes, such as the location of the centromere and  
584 heterochromatin-rich regions (Copenhaver *et al.* 1999; Haupt *et al.* 2001). Roesti *et al.* (2013)  
585 observe similar recombination landscapes in stickleback and suggest it might be due to  
586 peripheral clustering during meiosis prophase I to facilitate homolog pairing (Harper *et al.* 2004;  
587 Brown *et al.* 2005). Regardless of the mechanism, the observed genomic architecture will drive  
588 substantial heterogeneity in the propensity of favorable and/or maladaptive alleles to come  
589 together, break apart, and introgress in heterospecific backgrounds.

#### 590 *Trait-Preference Co-evolution*

591 One way in which recombination heterogeneity may be important in the study system is in  
592 facilitating trait-preference co-evolution. If trait and preference genes are coupled through  
593 physical linkage (Kirkpatrick and Hall 2004), linkage can be stronger and span wider physical  
594 distances in regions with reduced recombination. We hypothesized that recombination facilitates  
595 linkage between trait and preference genes in *Laupala* because a previous study showed that a  
596 major song QTL (~9% of the parental difference in male song) co-localizes with a preference  
597 QTL (~14% of parental difference for female preference) in a cross between *L. kohalensis* and *L.*  
598 *paranigra* (Shaw and Lesnick 2009). Contrary to our expectation, we show that the co-localizing  
599 QTL fall in a region with intermediate to high recombination rates (> 2.0 cM) compared to  
600 chromosomal averages (typically 1 - 2 cM). This suggests that reduced recombination over larger  
601 physical distances is unlikely to be driving trait-preference co-evolution in this system.  
602 Importantly, a high speciation rate and wide-spread divergence in sexual signaling phenotypes  
603 suggest a primary role for trait-preference co-evolution in *Laupala* speciation (Mendelson and  
604 Shaw 2005; Shaw *et al.* 2011). Additionally, although these species have likely diverged in

605 allopatry (Mendelson and Shaw 2005), some level of interspecific gene exchange is likely given  
606 historical biogeography, widespread secondary contact and evidence derived from discordant  
607 nuclear and mitochondrial gene trees (Shaw 2002).

608 How then is linkage disequilibrium between traits and preferences maintained? First, QTL may  
609 co-localize due to very tight physical linkage or pleiotropy instead of looser linkage. Under these  
610 two mechanisms, a lack of physical space for crossing over to occur rather than low  
611 recombination rates maintains linkage disequilibrium. Linkage disequilibrium might also persist  
612 in the face of recombination if strong assortative mating results from female mate preference. In  
613 this case, genetic correlations between the sexes will evolve, coupling signal and preference  
614 independent of their genetic distance (Fisher 1930; Lande 1981). Recent simulation studies  
615 showed that the probability with which recombination rate modifiers that link co-adaptive alleles  
616 spread in a populations is lower when assortative mating is strong, recombination between loci is  
617 low, and selection on the loci themselves is strong (Feder *et al.* 2014; Dagilis and Kirkpatrick  
618 2016). Third, the current test involves only a single locus and additional tests are required to  
619 more robustly examine the relationship between recombination and trait-preference co-evolution.  
620 We observed that several known male song QTL on other linkage groups fall in regions of low  
621 recombination. Additional female preference QTL covary with these song QTL as well (Wiley *et*  
622 *al.* 2012) although precise map locations are not yet known.

623 In summary, we find limited variation in chromosome structure among species, but strong  
624 heterogeneity in the recombination landscape across the genome. We present a *de novo* genome  
625 assembly and anchor a substantial part of the *L. kohalensis* genome to pseudomolecules. Crickets  
626 are an important model system for evolutionary and neurobiological research (Horch *et al.*  
627 2017). but limited genomic resources are available. The first Orthopteran pseudomolecule-level

628 draft genome and recombination rate map are thus important new contributions to future  
629 speciation genomics research. This study further provides important insight into the extent to  
630 which structural variation and genetic incompatibilities contribute to isolation among closely  
631 related, sexually divergent species. We also shine light on the role of recombination in trait-  
632 preference co-evolution and argue that current evidence supports that, at least in *Laupala*, the  
633 evolution of behavioral isolation is not contingent on structural genomic variation and locally  
634 reduced recombination.

### 635 **ACKNOWLEDGEMENTS**

636 We thank Stephen Chenoweth and two anonymous reviewers for helpful comments that strongly  
637 improved the quality of this manuscript. We further thank the Shaw lab, in particular Mingzi Xu,  
638 as well as Michael Sheehan and other members from Cornell's Neurobiology and Behavior  
639 department for input that contributed to the interpretation of the findings. This work was  
640 supported by the National Science Foundation (DEB 1241060, IOS 1257682 and IOS 0843528).

### 641 **REFERENCES**

- 642 Anderson L. K., Doyle G. G., Brigham B., Carter J., Hooker K. D., *et al.*, 2003 High-resolution  
643 crossover maps for each bivalent of *Zea mays* using recombination nodules. *Genetics* 165:  
644 849–865.
- 645 Andersson M., Simmons L. W., 2006 Sexual selection and mate choice. *Trends Ecol. Evol.* 21:  
646 296–302.
- 647 Arnegard M. E., Kondrashov A. S., Noor M., 2004. Sympatric speciation by sexual selection  
648 alone is unlikely. *Evolution.* 58: 222–237.

- 649 Aronesty E., 2011 ea-utils: Command-line tools for processing biological sequencing data.  
650 Durham, NC : Expr. Anal.
- 651 Auwera G. A. Van der, Carneiro M. O., Hartl C., Poplin R., Angel G. del, *et al.*, 2013 From  
652 FastQ Data to High-Confidence Variant Calls: The Genome Analysis Toolkit Best Practices  
653 Pipeline. *Curr. Protoc. Bioinformatics* 43: 1–11.
- 654 Backström N., Forstmeier W., Schielzeth H., Mellenius H., Nam K., *et al.*, 2010 The  
655 recombination landscape of the zebra finch *Taeniopygia guttata* genome. *Genome Res.* 20:  
656 485–95.
- 657 Barb J. G., Bowers J. E., Renaut S., Rey J. I., Knapp S. J., *et al.*, 2014 Chromosomal Evolution  
658 and Patterns of Introgression in *Helianthus*. *Genetics* 197: 969–979.
- 659 Benjamini Y., Hochberg Y., 1995 Controlling the false discovery rate: a practical and powerful  
660 approach to multiple testing. *J. R. Stat. Soc. Ser. B* 57: 289–300.
- 661 Beukeboom L. W., Niehuis O., Pannebakker B. A., Koevoets T., Gibson J. D., *et al.*, 2010 A  
662 comparison of recombination frequencies in intraspecific versus interspecific mapping  
663 populations of *Nasonia*. *Heredity.* 104: 302–309.
- 664 Blankers T., Oh K. P., Shaw K. L., 2018 The genetic basis of inter-island mating behavior  
665 divergence. *bioRxiv*.
- 666 Broman K. W., Wu H., Sen S., Churchill G. A., 2003 R/qtl: QTL mapping in experimental  
667 crosses. *Bioinformatics* 19: 889–890.
- 668 Brown P. W., Judis L., Chan E. R., Schwartz S., Seftel A., *et al.*, 2005 Meiotic Synapsis  
669 Proceeds from a Limited Number of Subtelomeric Sites in the Human Male. *Am. J. Hum.*



- 670 Genet. 77: 556–566.
- 671 Bürger R., Akerman A., 2011 The effects of linkage and gene flow on local adaptation: A two-  
672 locus continent-island model. *Theor. Popul. Biol.* 80: 272–288.
- 673 Burri R., Nater A., Kawakami T., Mugal C. F., Olason P. I., *et al.*, 2015 Linked selection and  
674 recombination rate variation drive the evolution of the genomic landscape of differentiation  
675 across the speciation continuum of *Ficedula* flycatchers. *Genome Res.* 25: 1656–1665.
- 676 Burt A., Trivers R., 2006 *Genes in Conflict: The Biology of Selfish Genetic Elements*. Belknap,  
677 Cambridge, MA.
- 678 Butlin R. K., 2005 Recombination and speciation. *Mol. Ecol.* 14: 2621–2635.
- 679 Copenhaver G. P., Nickel K., Kuromori T., Benito M.-I., Kaul S., *et al.*, 1999 Genetic definition  
680 and sequence analysis of *Arabidopsis* centromeres. *Science* 286: 2468–2474.
- 681 Coyne J. A., Orr H. A., 2004 *Speciation*. Sinauer, Sunderland, MA.
- 682 Cutter A. D., Payseur B. A., 2013 Genomic signatures of selection at linked sites: unifying the  
683 disparity among species. *Nat. Rev. Genet.* 14: 262–274.
- 684 Dagilis A. J., Kirkpatrick M., 2016 Prezygotic isolation, mating preferences, and the evolution of  
685 chromosomal inversions. *Evolution* 70: 1465–1472.
- 686 Danecek P., Auton A., Abecasis G., Albers C. A., Banks E., *et al.*, 2011 The variant call format  
687 and VCFtools. *Bioinformatics* 27: 2156–2158.
- 688 Danley P. D., Mullen S. P., Liu F., Nene V., Quackenbush J., *et al.*, 2007 A cricket Gene Index:  
689 a genomic resource for studying neurobiology, speciation, and molecular evolution. *BMC*  
690 *Genomics* 8: 109.

- 691 Davey J. W., Barker S. L., Rastas P. M., Pinharanda A., Martin S. H., *et al.*, 2017 No evidence  
692 for maintenance of a sympatric *Heliconius* species barrier by chromosomal inversions.  
693 *Evol. Lett.* 1: 138–154.
- 694 DePristo M. A., Banks E., Poplin R., Garimella K. V., Maguire J. R., *et al.*, 2011 A framework  
695 for variation discovery and genotyping using next-generation DNA sequencing data. *Nat.*  
696 *Genet.* 43: 491–498.
- 697 Dobzhansky T., 1937 *Genetics and the Origin of Species*. Columbia University Press, New York,  
698 NY.
- 699 Dodt M., Roehr J. T., Ahmed R., Dieterich C., 2012 FLEXBAR—flexible barcode and adapter  
700 processing for next-generation sequencing platforms. *Biology.* 1: 895–905.
- 701 Elshire R. J., Glaubitz J. C., Sun Q., Poland J. A., Kawamoto K., *et al.*, 2011 A robust, simple  
702 genotyping-by-sequencing (GBS) approach for high diversity species. *PLoS One.* 6.
- 703 Feder J. L., Egan S. P., Nosil P., 2012 The genomics of speciation-with-gene-flow. *Trends*  
704 *Genet.* 28: 342–350.
- 705 Feder J. L., Nosil P., Flaxman S. M., 2014 Assessing when chromosomal rearrangements affect  
706 the dynamics of speciation: implications from computer simulations. *Front. Genet.* 5: 295.
- 707 Felsenstein J., 1981 Skepticism towards Santa Rosalia, or why are there so few kinds of animals?  
708 *Evolution* 35: 124–138.
- 709 Fisher R. A., 1930 *The genetical theory of natural selection*. Oxford University Press, New  
710 York.
- 711 Garrison E., Marth G., 2012 Haplotype-based variant detection from short-read sequencing.

- 712 arXiv: 1207.3907.
- 713 Gavrillets S., 2003 Perspective: models of speciation: what have we learned in 40 years?  
714 Evolution 57: 2197–2215.
- 715 Gillespie J. H., 2000 Genetic drift in an infinite population: the pseudohitchhiking model.  
716 Genetics 155: 909–919.
- 717 Grace J. L., Shaw K. L., 2011 Coevolution of male mating signal and female preference during  
718 early lineage divergence of the Hawaiian cricket, *Laupala Cerasina*. Evolution 65: 2184–  
719 2196.
- 720 Hallmann C. A., Sorg M., Jongejans E., Siepel H., Hofland N., *et al.*, 2017 More than 75 percent  
721 decline over 27 years in total flying insect biomass in protected areas. PLoS One 12: 1–21.
- 722 Harper L., Golubovskaya I., Cande W. Z., 2004 A bouquet of chromosomes. J. Cell Sci. 117:  
723 4025-4032.
- 724 Haupt W., Fischer T. C., Winderl S., Franz P., Torres-Ruiz R. A., 2001 The centromere1  
725 (CEN1) region of *Arabidopsis thaliana*: architecture and functional impact of chromatin.  
726 Plant J. 27: 285–296.
- 727 Hill W. G., Robertson A., 1966 The effect of linkage on limits to artificial selection. Genet. Res.  
728 8: 269–294.
- 729 Horch H. W., Mito T., Popadic A., Ohuchi H., Noji S. (Eds.), 2017 *The cricket as a model*  
730 *organism*. Springer Japan, Tokyo, Japan.
- 731 Kent W. J., 2002 BLAT—the BLAST-like alignment tool. Genome Res. 12: 656–664.
- 732 Kim D., Pertea G., Trapnell C., Pimentel H., Kelley R., *et al.*, 2013 TopHat2: accurate alignment

- 733 of transcriptomes in the presence of insertions, deletions and gene fusions. *Genome Biol.*  
734 14: R36.
- 735 Kirkpatrick P., 1982 Sexual selection and the evolution of female mate choice. *Evolution* 36: 1–  
736 12.
- 737 Kirkpatrick M., Ravigne V., 2002 Speciation by natural and sexual selection: models and  
738 experiments. *Am. Nat.* 159 suppl: S22–S35.
- 739 Kirkpatrick M., Hall D. W., 2004 Sexual selection and sex linkage. *Evolution.* 58: 683–691.
- 740 Kirkpatrick M., Barton N., 2006 Chromosome inversions, local adaptation and speciation.  
741 *Genetics* 173: 419–434.
- 742 Kulathinal R. J., Bennett S. M., Fitzpatrick C. L., Noor M. A. F., 2008 Fine-scale mapping of  
743 recombination rate in *Drosophila* refines its correlation to diversity and divergence. *Proc.*  
744 *Natl. Acad. Sci.* 105: 10051–10056.
- 745 Lande R., 1981 Models of speciation by sexual selection on polygenic traits. *Proc Natl Acad Sci*  
746 78: 3721–3725.
- 747 Lander E., Green P., Abrahamson J., Barlow A., Daly M., *et al.*, 1987 MAPMAKER: An  
748 interactive computer package for constructing primary genetic linkage maps of  
749 experimental and natural populations. *Genomics* 1: 174–181.
- 750 Langmead B., Salzberg S. L., 2012 Fast gapped-read alignment with Bowtie 2. *Nat. Methods* 9:  
751 357–359.
- 752 Larracuente A. M., Presgraves D. C., 2012 The Selfish Segregation Distorter Gene Complex of  
753 *Drosophila melanogaster*. *Genetics* 192: 33–53.

- 754 Li H., Durbin R., 2011 Inference of human population history from individual whole-genome  
755 sequences. *Nature* 475: 493–496.
- 756 Lincoln S. E., Daly M. J., Lander E. S., 1993 Constructing genetic linkage maps with  
757 MAPMAKER/EXP Version 3.0: a tutorial and reference manual. A Whitehead Inst.  
758 Biomed. Res. Tech. Rep.: 78–79.
- 759 Liu Y., Schröder J., Schmidt B., 2013 Musket: a multistage k-mer spectrum-based error corrector  
760 for Illumina sequence data. *Bioinformatics* 29: 308–315.
- 761 Luo R., Liu B., Xie Y., Li Z., Huang W., *et al.*, 2012 SOAPdenovo2: an empirically improved  
762 memory-efficient short-read de novo assembler. *Gigascience* 1: 18.
- 763 Mackay T. F. C., 2001 The genetic architecture of quantitative traits. *Annu. Rev. Genet.* 35:  
764 303–339.
- 765 Marques D. A., Lucek K., Meier J. I., Mwaiko S., Wagner C. E., *et al.*, 2016 Genomics of Rapid  
766 Incipient Speciation in Sympatric Threespine Stickleback. *PLoS Genet.* 12: 1–34.
- 767 Mendelson T. C., Shaw K. L., 2002 Genetic and behavioral components of the cryptic species  
768 boundary between *Laupala cerasina* and *L. kohalensis* (Orthoptera: Gryllidae). *Genetica*  
769 116: 301–310.
- 770 Mendelson T. C., Shaw K. L., 2005 Rapid speciation in an arthropod. *Nature* 433: 375–376.
- 771 Muller H., 1942 Isolating mechanisms, evolution, and temperature. *Biol. Symp.* 6: 71–125.
- 772 Myers S., Bottolo L., Freeman C., McVean G., Donnelly P., 2005 A Fine-Scale Map of  
773 Recombination Rates and Hotspots Across the Human Genome. *Science* 310: 321–324.
- 774 Niehuis O., Gibson J. D., Rosenberg M. S., Pannebakker B. A., Koevoets T., *et al.*, 2010

- 775 Recombination and its impact on the genome of the haplodiploid parasitoid wasp *Nasonia*.  
776 PLoS One 5: e8597.
- 777 Noor M. A., Grams K. L., Bertucci L. A., Reiland J., 2001 Chromosomal inversions and the  
778 reproductive isolation of species. Proc. Natl. Acad. Sci. 98: 12084–8.
- 779 Noor M. A. F., Bennett S. M., 2009 Islands of speciation or mirages in the desert? Examining the  
780 role of restricted recombination in maintaining species. Heredity 103: 439–44.
- 781 Ooijen J. W. van, 2006 JoinMap 4, Software for the calculation of genetic linkage maps in  
782 experimental populations.
- 783 Ortiz-Barrientos D., Engelstädter J., Rieseberg L. H., 2016 Recombination rate evolution and the  
784 origin of species. Trends Ecol. Evol. 31: 226–236.
- 785 Otte D., 1994 *The Crickets of Hawaii: Origin, Systematics, and Evolution*. Orthoptera  
786 Society/Academy of Natural Sciences of Philadelphia, Philadelphia, PA.
- 787 Otto S. P., 2009 The evolutionary enigma of sex. Am. Nat. 174: S1--S14.
- 788 Petrov D. A., Sangster T. A., Johnston J. S., Hartl D. L., Shaw K. L., 2000 Evidence for DNA  
789 loss as a determinant of genome size. Science 287: 1060–1062.
- 790 Poursarebani N., Ariyadasa R., Zhou R., Schulte D., Steuernagel B., *et al.*, 2013 Conserved  
791 synteny-based anchoring of the barley genome physical map. Funct. Integr. Genomics 13:  
792 339–350.
- 793 Presgraves D. C., 2010 Darwin and the Origin of Interspecific Genetic Incompatibilities. Am.  
794 Nat. 176: S45–S60.
- 795 R Development Core Team R., 2016 R: A Language and Environment for Statistical Computing

- 796 (RDC Team, Ed.). R Found. Stat. Comput. 1: 409.
- 797 Rieseberg L. H., 2001 Chromosomal rearrangements and speciation. Trends Ecol. Evol. 16: 351–  
798 357.
- 799 Rockman M. V., Kruglyak L., 2009 Recombinational landscape and population genomics of  
800 *Caenorhabditis elegans*. PLoS Genet 5: e1000419.
- 801 Roesti M., Moser D., Berner D., 2013 Recombination in the threespine stickleback genome -  
802 Patterns and consequences. Mol. Ecol. 22: 3014–3027.
- 803 Samuk K., Owens G. L., Delmore K. E., Miller S. E., Rennison D. J., *et al.*, 2017 Gene flow and  
804 selection interact to promote adaptive divergence in regions of low recombination. Mol.  
805 Ecol. 26: 4378–4390.
- 806 Schmieder R., Edwards R., 2011 Quality control and preprocessing of metagenomic datasets.  
807 Bioinformatics 27: 863–864.
- 808 Servedio M. R., 2009 The role of linkage disequilibrium in the evolution of premating isolation.  
809 Heredity 102: 51–56.
- 810 Servedio M. R., Burger R., 2014 The counterintuitive role of sexual selection in species  
811 maintenance and speciation. Proc. Natl. Acad. Sci. 111: 8113–8118.
- 812 Servedio M. R., 2015 Geography, assortative mating, and the effects of sexual selection on  
813 speciation with gene flow. Evol. Appl. 9: 91–102.
- 814 Shaw K. L., 1996 Polygenic Inheritance of a Behavioral Phenotype: Interspecific Genetics of  
815 Song in the Hawaiian Cricket Genus *Laupala*. Evolution 50: 256–266.
- 816 Shaw K. L., 2000a Further acoustic diversity in Hawaiian forests: two new species of Hawaiian

- 817 cricket (Orthoptera: Gryllidae: Trigonidiinae: *Laupala*). Zool. J. Linn. Soc. 129: 73–91.
- 818 Shaw K. L., 2000b Interspecific genetics of mate recognition: inheritance of female acoustic  
819 preference in Hawaiian crickets. *Evolution* 54: 1303–1312.
- 820 Shaw K. L., 2002 Conflict between nuclear and mitochondrial DNA phylogenies of a recent  
821 species radiation: what mtDNA reveals and conceals about modes of speciation in Hawaiian  
822 crickets. *Proc. Natl. Acad. Sci.* 99: 16122–16127.
- 823 Shaw K. L., Parsons Y. M., Lesnick S. C., 2007 QTL analysis of a rapidly evolving speciation  
824 phenotype in the Hawaiian cricket *Laupala*. *Mol. Ecol.* 16: 2879–2892.
- 825 Shaw K. L., Lesnick S. C., 2009 Genomic linkage of male song and female acoustic preference  
826 QTL underlying a rapid species radiation. *Proc. Natl. Acad. Sci.* 106: 9737–9742.
- 827 Shaw K. L., Ellison C. K., Oh K. P., Wiley C., 2011 Pleiotropy, “sexy” traits, and speciation.  
828 *Behav. Ecol.* 22: 1154–1155.
- 829 Simão F. A., Waterhouse R. M., Ioannidis P., Kriventseva E. V., Zdobnov E. M., 2015 BUSCO:  
830 assessing genome assembly and annotation completeness with single-copy orthologs.  
831 *Bioinformatics* 31: 3210.
- 832 Singhal S., Leffler E. M., Sannareddy K., Turner I., Venn O., *et al.*, 2015 Stable recombination  
833 hotspots in birds. *Science* 350: 928–932.
- 834 Slatkin M., 2008 Linkage disequilibrium—understanding the evolutionary past and mapping the  
835 medical future. *Nat. Rev. Genet.* 9: 477–485.
- 836 Smith J. M., Haigh J., 1974 The hitch-hiking effect of a favourable gene. *Genet. Res.* 23: 23–35.
- 837 Smith J. M., 1978 *The Evolution of Sex*. Cambridge University Press Cambridge.



- 838 Smukowski C. S., Noor M. A. F., 2011 Recombination rate variation in closely related species.  
839 *Heredity* 107: 496–508.
- 840 Smukowski Heil C. S., Ellison C., Dubin M., Noor M. A. F., 2015 Recombining without  
841 Hotspots: A Comprehensive Evolutionary Portrait of Recombination in Two Closely  
842 Related Species of *Drosophila*. *Genome Biol. Evol.* 7: 2829–42.
- 843 Stevison L. S., Hoehn K. B., Noor M. A. F., 2011 Effects of Inversions on Within- and Between-  
844 Species Recombination and Divergence. *Genome Biol. Evol.* 3: 830.
- 845 Stevison L. S., Sefick S., Rushton C., Graze R. M., 2017 Recombination rate plasticity: revealing  
846 mechanisms by design. *Philos. Trans. R. Soc. Lond. B. Biol. Sci.* 372: 20160459.
- 847 Tang H., Zhang X., Miao C., Zhang J., Ming R., *et al.*, 2015 ALLMAPS: robust scaffold  
848 ordering based on multiple maps. *Genome Biol.* 16: 3.
- 849 Voorrips R. E., 2002 MapChart: software for the graphical presentation of linkage maps and  
850 QTLs. *J. Hered.* 93: 77–78.
- 851 Wiley C., Ellison C. K., Shaw K. L., 2012 Widespread genetic linkage of mating signals and  
852 preferences in the Hawaiian cricket *Laupala*. *Proc. R. Soc. B Biol. Sci.* 279: 1203–1209.
- 853 Wilfert L., Gadau J., Schmid-Hempel P., 2007 Variation in genomic recombination rates among  
854 animal taxa and the case of social insects. *Heredity* 98: 189–197.
- 855 Wolf J. B. W., Ellegren H., 2016 Making sense of genomic islands of differentiation in light of  
856 speciation. *Nat. Rev. Gen.* 18: 87–100.
- 857 Yeaman S., Whitlock M. C., 2011 The genetic architecture of adaptation under migration-  
858 selection balance. *Evolution* 65: 1897–1911.

859 Yeaman S., 2013 Genomic rearrangements and the evolution of clusters of locally adaptive loci.  
860 Proc. Natl. Acad. Sci. 110: E1743--E1751.

861

## 862 **FIGURE LEGENDS**

863 Figure 1. Study design. (A) The phylogenetic relationships of studied *Laupala* species based on a  
864 neighbor joining tree generated from genetic distances among the parental lines used in this  
865 study. Dashed grey lines connect species pairs that were crossed. (B) Approximate distributions  
866 of the studied species on the Big Island of Hawaii. (C) Hypothetical segregation and linkage map  
867 construction for five genetic loci A, B, C, D, and E in three crosses of four species. The genetic  
868 distance between the loci is 5 centi-Morgan (cM) in each of the four species. Loci [B,C,D] are  
869 inverted in the green and black species. When two species that have alternative karyotypes for  
870 the inversion are crossed (pair 2), loci in the inversion will not recombine in the first generation  
871 hybrid, resulting in reduced genetic (map) length in the second generation hybrid. Other  
872 chromosomal rearrangements will have similar effects. Only if two crosses involve  
873 homokaryotypic species pairs that have alternative karyotypes can an inversion be detected in a  
874 comparison of intercross linkage maps.

875 Figure 2. Initial linkage maps. Bars represent linkage groups (LG) for ParKoh, KonPar, and  
876 PruKoh. Lines within the bars indicate marker positions. The scale on the left measures marker  
877 spacing in cM. Blue lines connect markers on the same scaffold between the different maps. The  
878 map for ParKoh is shown twice to facilitate comparison across all three maps. See Fig S1 for  
879 comprehensive maps.

880 Figure 3. Segregation distortion. For each of the seven autosomal linkage groups within the three  
881 comprehensive linkage maps (from top to bottom: ParKoh, KonPar, PruKoh), a sliding window

882 of the negative log-transformed P-values for the  $\chi^2$ -square test for deviation from a 1:2:1  
883 segregation ratio is shown across markers with black lines in the top panels. In the panel below,  
884 the trace of the frequency of heterozygote genotypes (blue lines) and homozygote genotypes for  
885 both parental alleles (black and red lines, respectively) is shown. For each intercross, dashed  
886 grey lines indicate  $P = 0.01$  (top panels) or expected allele frequencies based on 1:2:1 inheritance  
887 (bottom panels).

888 Figure 4. Recombination and Marey maps. Gray-scale symbols and lines indicate the relationship  
889 between the physical distance (scaffold midposition) in million base pairs on the x-axis and the  
890 genetic distance in cM for each of the 8 linkage groups on the left y-axis. Open dots represent the  
891 dense ParKoh linkage map, triangles and diamonds that of the KonPar and PruKoh cross,  
892 respectively. The corresponding lines (ParKoh: solid, KonPar: dashed, PruKoh: dotted) indicate  
893 the fitted smoothing spline (10 degrees of freedom). The red lines (same stroke style) show the  
894 first order derivative of the fitted splines and represent the variation in recombination rate (in cM  
895 per Mb, on the right y-axis) as a function of physical distance. Grey bars indicate the  
896 approximate location of male song rhythm QTL peaks. The yellow star in the LG1 panel  
897 highlights the QTL peak that co-localizes with a female preference QTL peak (Shaw & Lesnick  
898 2009).

899

## 900 **SUPPLEMENTARY MATERIAL**

901 Table S1. Geographic locations of sampled populations

902 Table S2. Segregation distortion (count of heterozygotes per genotype) statistics.

903 Table S3. Summary statistics for anchored assembly

904 Table S4. Integrated AFLP and SNP map for the *L. kohalensis* x *L. paranigra* cross

- 905 Figure S1. Comprehensive linkage maps.
- 906 Figure S2. ALLMAPS output
- 907 Figure S3. Coverage per cross per linkage group

A

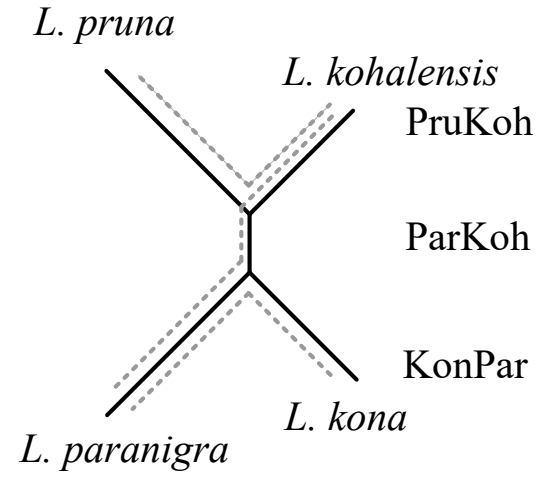

B

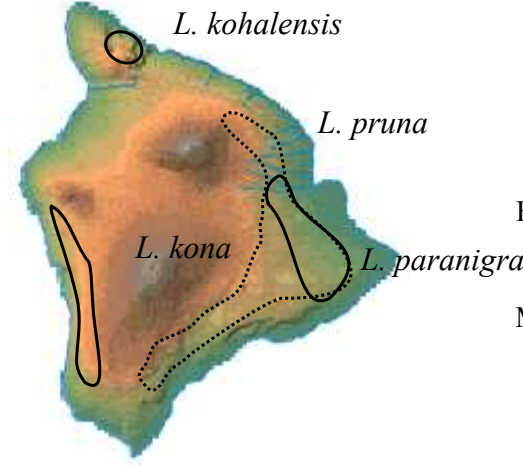

C

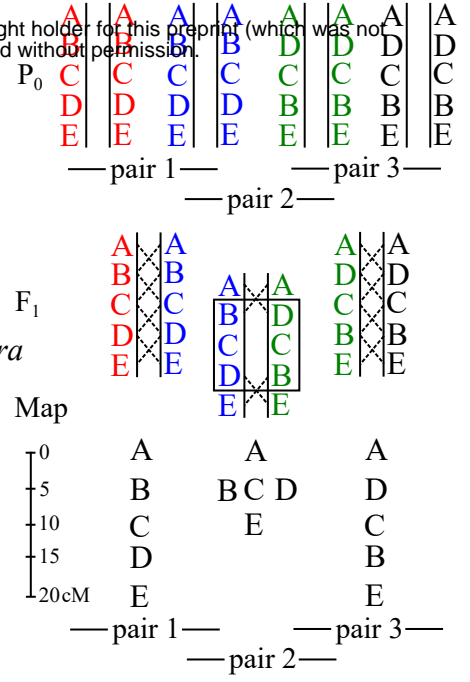

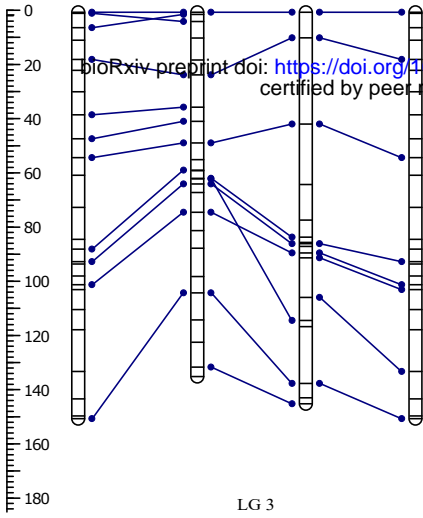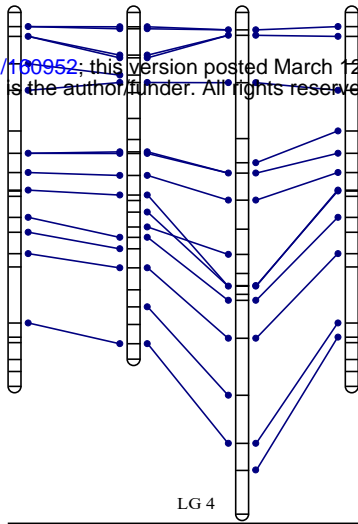

bioRxiv preprint doi: <https://doi.org/10.1101/106952>; this version posted March 12, 2018. The copyright holder for this preprint (which was not certified by peer review) is the author/funder. All rights reserved. No reuse allowed without permission.

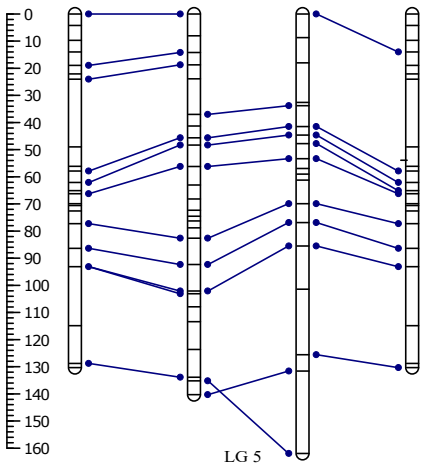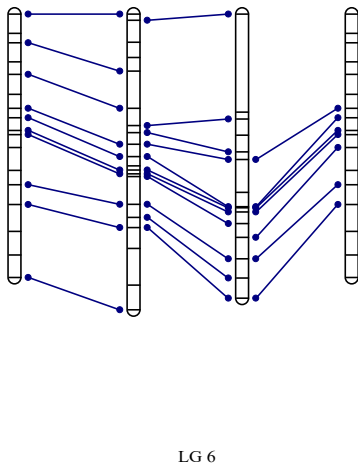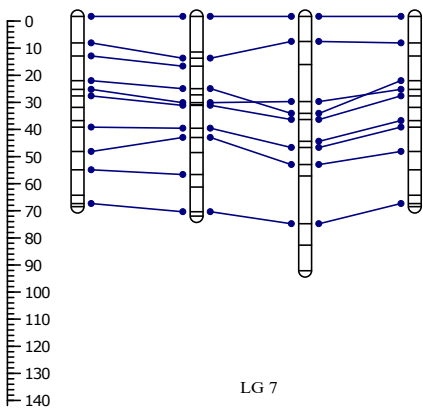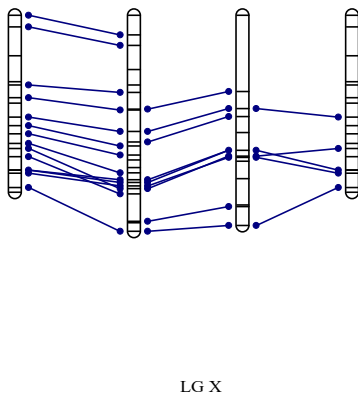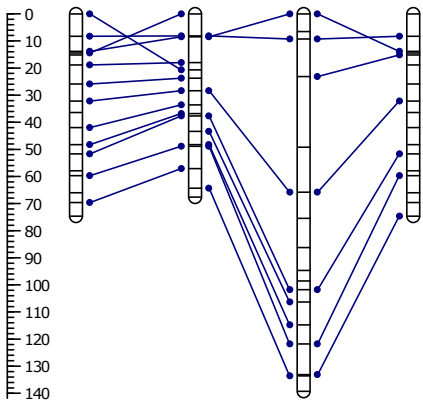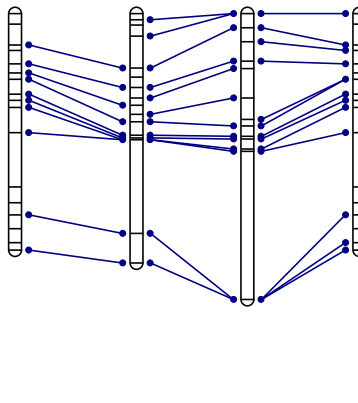

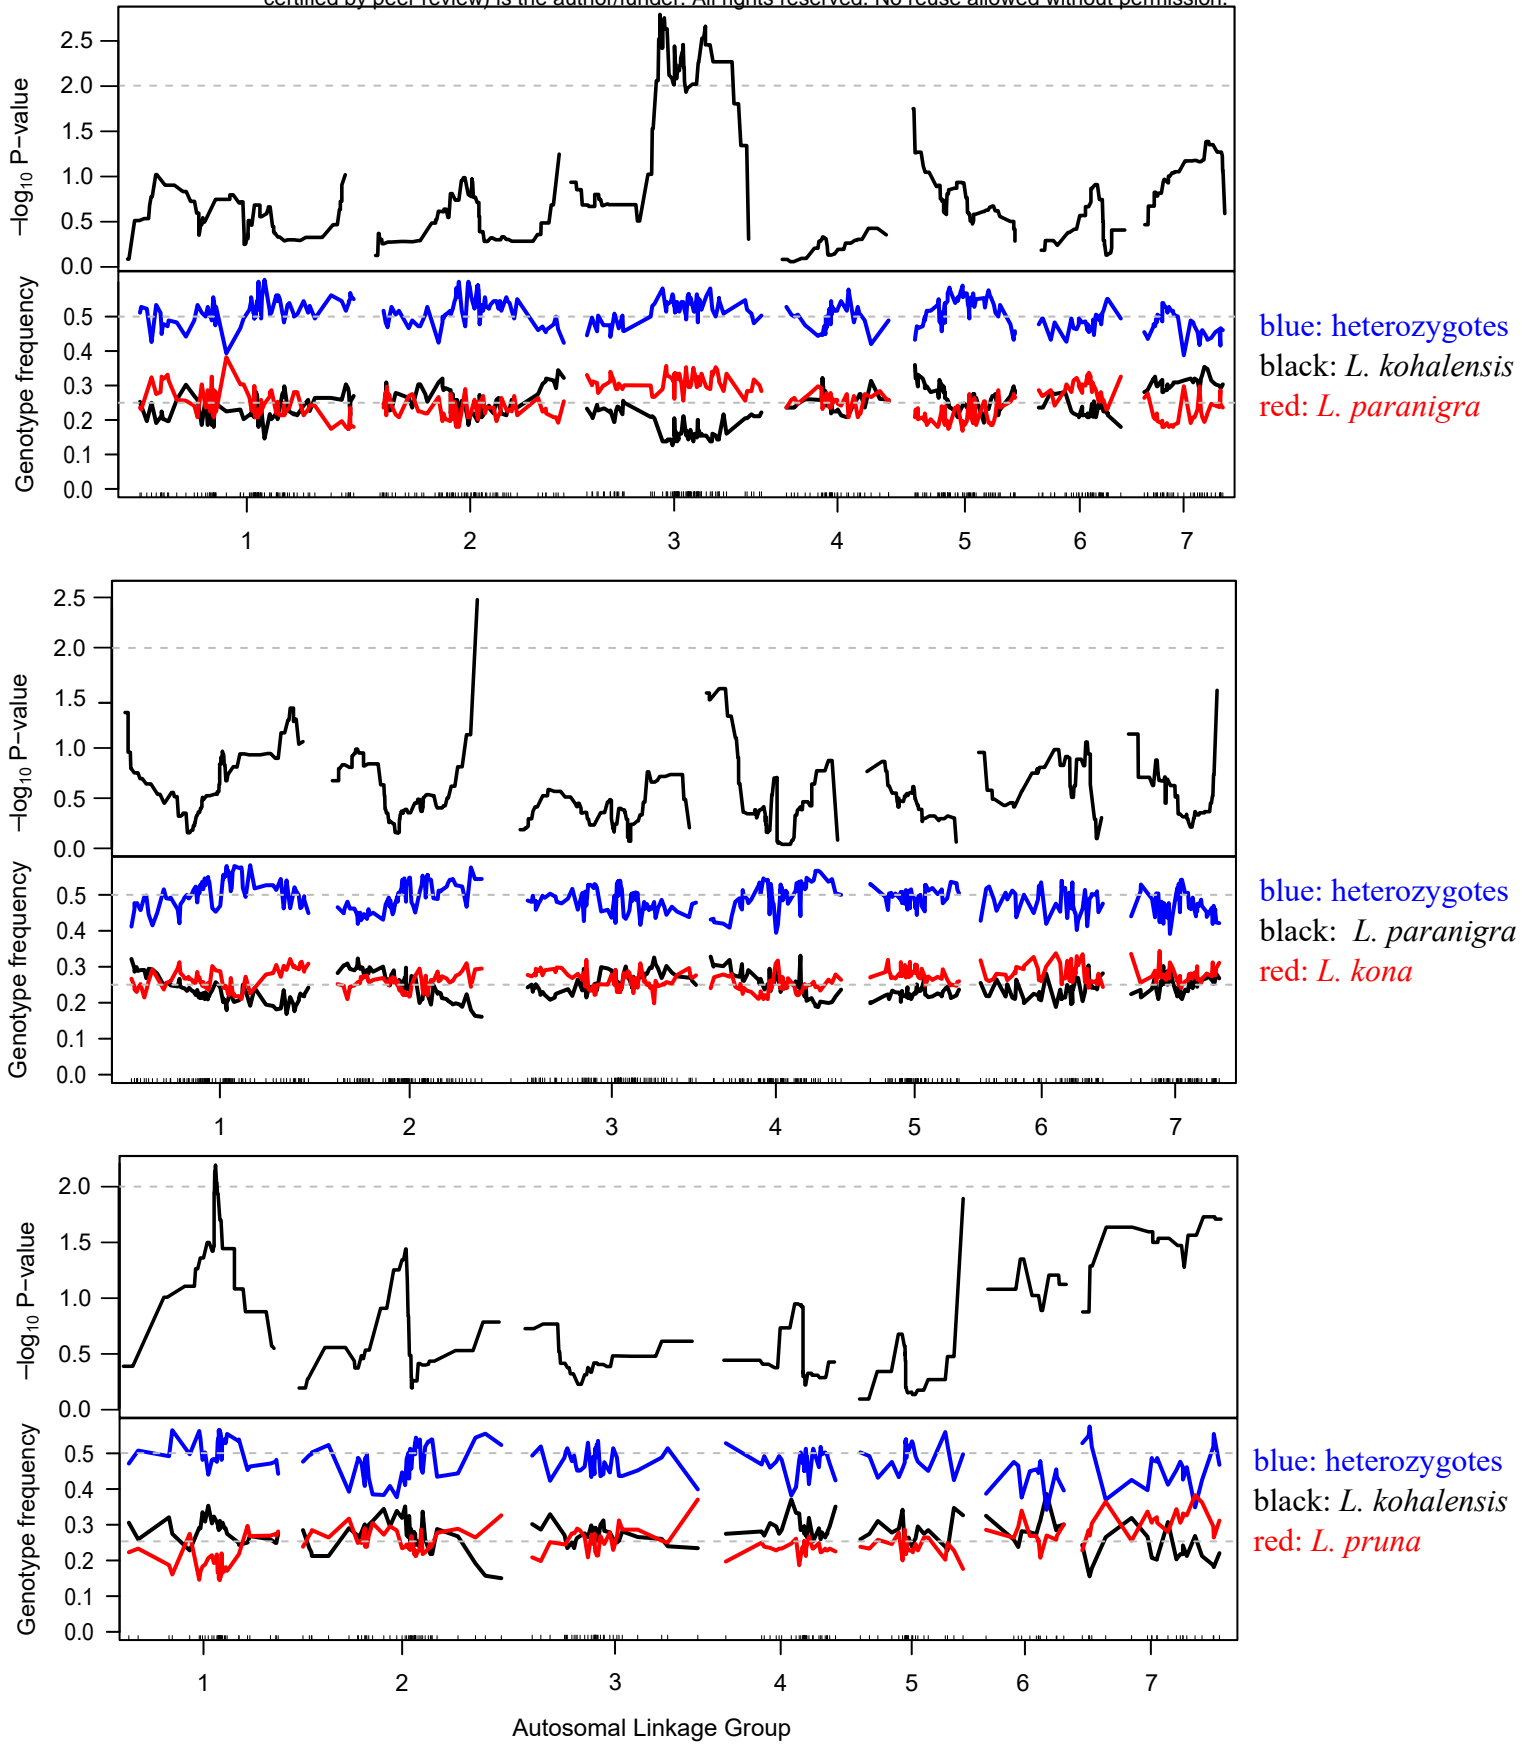

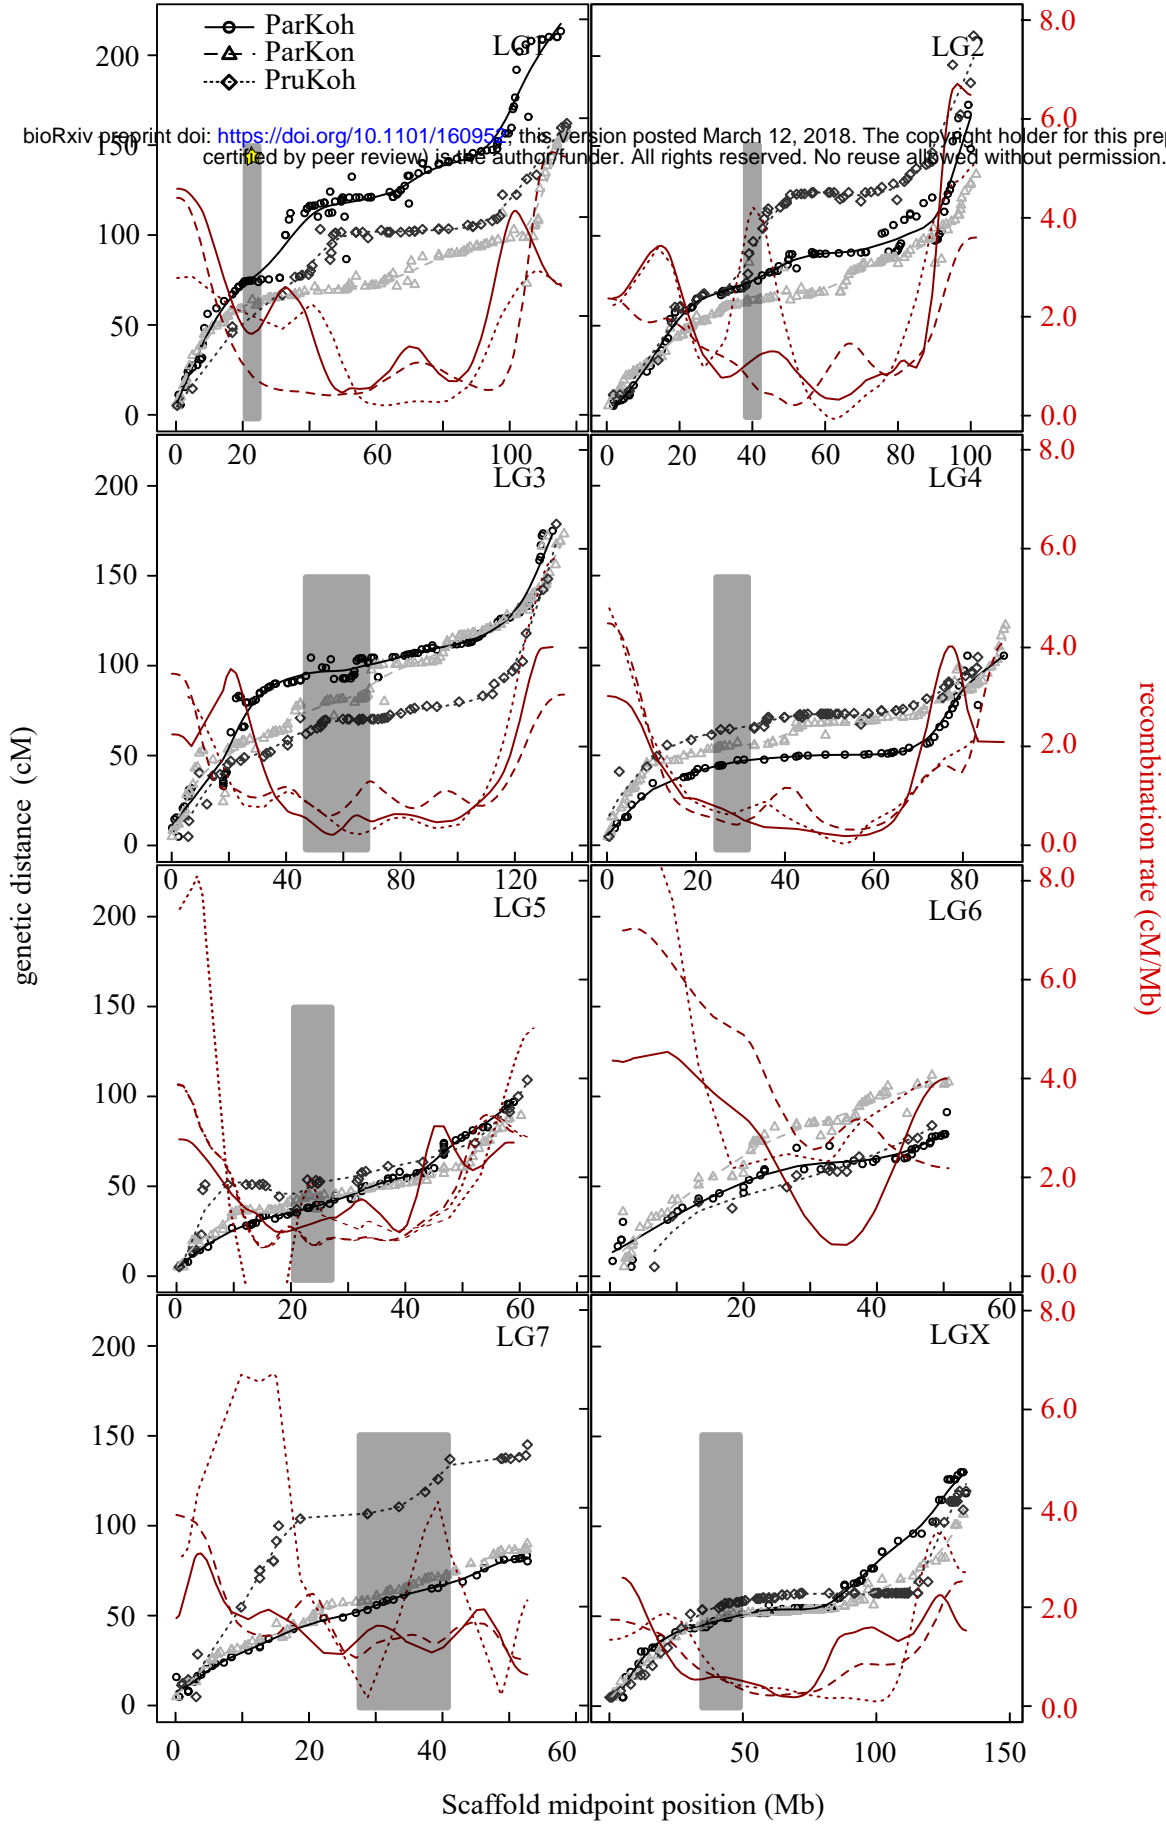



Table S1. Geographic locations of sampled populations

| Species              | Locality Name | Latitude (N) | Longitude (W) |
|----------------------|---------------|--------------|---------------|
| <i>L. kona</i>       | Manuka        | 19 deg 12'   | 155 deg 81'   |
| <i>L. paranigra</i>  | Kaiwika       | 19 deg 46'   | 155 deg 10'   |
| <i>L. kohalensis</i> | Pololu Valley | 20 deg 10'   | 155 deg 46'   |
| <i>L. pruna</i>      | Kaiholena     | 19 deg 10'   | 155 deg 35'   |

Table S2. Segregation distortion (count of heterozygotes per genotype) statistics. *post hoc* Tukey Honest Significant Differences corresponding to the number of heterozygotes (a) across linkage groups (b) across species, (c) and across species nested in linkage groups

| contrast      | difference | lower bound | upper bound | P-adjusted    |
|---------------|------------|-------------|-------------|---------------|
| <b>(a)</b>    |            |             |             |               |
| 1--3          | 0.017921   | 0.009122    | 0.026719    | <b>0.0000</b> |
| 2--3          | 0.008175   | -0.00072    | 0.017069    | 0.0954        |
| 4--3          | -0.00601   | -0.01562    | 0.003601    | 0.5168        |
| 5--3          | 0.008896   | -0.00102    | 0.018812    | 0.1125        |
| 7--3          | -0.02664   | -0.03742    | -0.01586    | <b>0.0000</b> |
| 6--3          | -0.01786   | -0.02932    | -0.0064     | <b>0.0001</b> |
| 2--1          | -0.00975   | -0.01874    | -0.00075    | <b>0.0237</b> |
| 4--1          | -0.02393   | -0.03364    | -0.01423    | <b>0.0000</b> |
| 5--1          | -0.00902   | -0.01903    | 0.000982    | 0.1086        |
| 7--1          | -0.04456   | -0.05543    | -0.0337     | <b>0.0000</b> |
| 6--1          | -0.03578   | -0.04732    | -0.02425    | <b>0.0000</b> |
| 4--2          | -0.01419   | -0.02398    | -0.0044     | <b>0.0004</b> |
| 5--2          | 0.00072    | -0.00937    | 0.01081     | 1.0000        |
| 7--2          | -0.03482   | -0.04576    | -0.02388    | <b>0.0000</b> |
| 6--2          | -0.02604   | -0.03764    | -0.01443    | <b>0.0000</b> |
| 5--4          | 0.014907   | 0.004178    | 0.025637    | <b>0.0009</b> |
| 7--4          | -0.02063   | -0.03216    | -0.0091     | <b>0.0000</b> |
| 6--4          | -0.01185   | -0.02402    | 0.000318    | 0.0622        |
| 7--5          | -0.03554   | -0.04732    | -0.02375    | <b>0.0000</b> |
| 6--5          | -0.02676   | -0.03917    | -0.01435    | <b>0.0000</b> |
| 6--7          | 0.008781   | -0.00433    | 0.021891    | <b>0.4295</b> |
| <b>(b)</b>    |            |             |             |               |
| konpar-parkoh | -0.0155    | -0.02039    | -0.01062    | <b>0.0000</b> |
| prukoh-parkoh | -0.02437   | -0.03058    | -0.01816    | <b>0.0000</b> |
| prukoh-konpar | -0.00886   | -0.01475    | -0.00297    | <b>0.0012</b> |
| <b>(c)</b>    |            |             |             |               |

|                   |          |          |           |               |
|-------------------|----------|----------|-----------|---------------|
| 1:parkoh-3:parkoh | -0.00225 | -0.01967 | 1.52E-02  | 1.0000        |
| 2:parkoh-3:parkoh | 0.008894 | -0.00981 | 2.76E-02  | 0.9835        |
| 4:parkoh-3:parkoh | -0.02438 | -0.0469  | -1.87E-03 | <b>0.0178</b> |
| 5:parkoh-3:parkoh | 0.003542 | -0.01602 | 2.31E-02  | 1.0000        |
| 7:parkoh-3:parkoh | -0.05123 | -0.07443 | -2.80E-02 | <b>0.0000</b> |
| 6:parkoh-3:parkoh | -0.03392 | -0.05676 | -1.11E-02 | <b>0.0000</b> |
| 3:konpar-3:parkoh | -0.03299 | -0.04963 | -1.63E-02 | <b>0.0000</b> |
| 1:konpar-3:parkoh | -0.0081  | -0.02516 | 8.96E-03  | 0.9839        |
| 2:konpar-3:parkoh | -0.01921 | -0.03615 | -2.27E-03 | <b>0.0089</b> |
| 4:konpar-3:parkoh | -0.01981 | -0.03754 | -2.07E-03 | <b>0.0113</b> |
| 5:konpar-3:parkoh | -0.0266  | -0.04561 | -7.60E-03 | <b>0.0001</b> |
| 7:konpar-3:parkoh | -0.05016 | -0.06964 | -3.07E-02 | <b>0.0000</b> |
| 6:konpar-3:parkoh | -0.03407 | -0.05469 | -1.35E-02 | <b>0.0000</b> |
| 3:prukoh-3:parkoh | -0.03762 | -0.05901 | -1.62E-02 | <b>0.0000</b> |
| 1:prukoh-3:parkoh | 0.000708 | -0.02165 | 2.31E-02  | 1.0000        |
| 2:prukoh-3:parkoh | -0.0359  | -0.05673 | -1.51E-02 | <b>0.0000</b> |
| 4:prukoh-3:parkoh | -0.04794 | -0.06946 | -2.64E-02 | <b>0.0000</b> |
| 5:prukoh-3:parkoh | -0.01828 | -0.04429 | 7.73E-03  | 0.5987        |
| 7:prukoh-3:parkoh | -0.04113 | -0.06927 | -1.30E-02 | <b>0.0000</b> |
| 6:prukoh-3:parkoh | -0.0881  | -0.12526 | -5.09E-02 | <b>0.0000</b> |
| 2:parkoh-1:parkoh | 0.011142 | -0.00727 | 2.96E-02  | 0.8411        |
| 4:parkoh-1:parkoh | -0.02214 | -0.04441 | 1.39E-04  | <b>0.0537</b> |
| 5:parkoh-1:parkoh | 0.00579  | -0.0135  | 2.51E-02  | 1.0000        |
| 7:parkoh-1:parkoh | -0.04899 | -0.07195 | -2.60E-02 | <b>0.0000</b> |
| 6:parkoh-1:parkoh | -0.03167 | -0.05428 | -9.06E-03 | <b>0.0001</b> |
| 3:konpar-1:parkoh | -0.03074 | -0.04706 | -1.44E-02 | <b>0.0000</b> |
| 1:konpar-1:parkoh | -0.00585 | -0.02259 | 1.09E-02  | 0.9997        |
| 2:konpar-1:parkoh | -0.01696 | -0.03359 | -3.44E-04 | <b>0.0391</b> |
| 4:konpar-1:parkoh | -0.01756 | -0.03498 | -1.32E-04 | <b>0.0457</b> |
| 5:konpar-1:parkoh | -0.02436 | -0.04308 | -5.64E-03 | <b>0.0007</b> |
| 7:konpar-1:parkoh | -0.04791 | -0.06712 | -2.87E-02 | <b>0.0000</b> |
| 6:konpar-1:parkoh | -0.03183 | -0.05218 | -1.15E-02 | <b>0.0000</b> |
| 3:prukoh-1:parkoh | -0.03537 | -0.05651 | -1.42E-02 | <b>0.0000</b> |
| 1:prukoh-1:parkoh | 0.002956 | -0.01916 | 2.51E-02  | 1.0000        |
| 2:prukoh-1:parkoh | -0.03366 | -0.05422 | -1.31E-02 | <b>0.0000</b> |
| 4:prukoh-1:parkoh | -0.04569 | -0.06696 | -2.44E-02 | <b>0.0000</b> |
| 5:prukoh-1:parkoh | -0.01603 | -0.04183 | 9.77E-03  | 0.8077        |
| 7:prukoh-1:parkoh | -0.03888 | -0.06683 | -1.09E-02 | <b>0.0001</b> |
| 6:prukoh-1:parkoh | -0.08585 | -0.12287 | -4.88E-02 | <b>0.0000</b> |
| 4:parkoh-2:parkoh | -0.03328 | -0.05656 | -9.99E-03 | <b>0.0001</b> |
| 5:parkoh-2:parkoh | -0.00535 | -0.0258  | 1.51E-02  | 1.0000        |

|                   |          |          |           |               |
|-------------------|----------|----------|-----------|---------------|
| 7:parkoh-2:parkoh | -0.06013 | -0.08407 | -3.62E-02 | <b>0.0000</b> |
| 6:parkoh-2:parkoh | -0.04281 | -0.06642 | -1.92E-02 | <b>0.0000</b> |
| 3:konpar-2:parkoh | -0.04188 | -0.05956 | -2.42E-02 | <b>0.0000</b> |
| 1:konpar-2:parkoh | -0.01699 | -0.03506 | 1.08E-03  | <b>0.0965</b> |
| 2:konpar-2:parkoh | -0.02811 | -0.04606 | -1.02E-02 | <b>0.0000</b> |
| 4:konpar-2:parkoh | -0.0287  | -0.0474  | -1.00E-02 | <b>0.0000</b> |
| 5:konpar-2:parkoh | -0.0355  | -0.05541 | -1.56E-02 | <b>0.0000</b> |
| 7:konpar-2:parkoh | -0.05905 | -0.07942 | -3.87E-02 | <b>0.0000</b> |
| 6:konpar-2:parkoh | -0.04297 | -0.06442 | -2.15E-02 | <b>0.0000</b> |
| 3:prukoh-2:parkoh | -0.04651 | -0.06872 | -2.43E-02 | <b>0.0000</b> |
| 1:prukoh-2:parkoh | -0.00819 | -0.03132 | 1.49E-02  | 0.9997        |
| 2:prukoh-2:parkoh | -0.0448  | -0.06645 | -2.31E-02 | <b>0.0000</b> |
| 4:prukoh-2:parkoh | -0.05684 | -0.07916 | -3.45E-02 | <b>0.0000</b> |
| 5:prukoh-2:parkoh | -0.02717 | -0.05385 | -4.95E-04 | <b>0.0402</b> |
| 7:prukoh-2:parkoh | -0.05003 | -0.07879 | -2.13E-02 | <b>0.0000</b> |
| 6:prukoh-2:parkoh | -0.09699 | -0.13463 | -5.94E-02 | <b>0.0000</b> |
| 5:parkoh-4:parkoh | 0.027926 | 0.003943 | 5.19E-02  | <b>0.0058</b> |
| 7:parkoh-4:parkoh | -0.02685 | -0.05388 | 1.77E-04  | <b>0.0539</b> |
| 6:parkoh-4:parkoh | -0.00953 | -0.03626 | 1.72E-02  | 0.9996        |
| 3:konpar-4:parkoh | -0.0086  | -0.03027 | 1.31E-02  | 0.9982        |
| 1:konpar-4:parkoh | 0.016287 | -0.0057  | 3.83E-02  | 0.4920        |
| 2:konpar-4:parkoh | 0.005171 | -0.01673 | 2.71E-02  | 1.0000        |
| 4:konpar-4:parkoh | 0.004578 | -0.01794 | 2.71E-02  | 1.0000        |
| 5:konpar-4:parkoh | -0.00222 | -0.02575 | 2.13E-02  | 1.0000        |
| 7:konpar-4:parkoh | -0.02577 | -0.04969 | -1.85E-03 | <b>0.0192</b> |
| 6:konpar-4:parkoh | -0.00969 | -0.03454 | 1.52E-02  | 0.9986        |
| 3:prukoh-4:parkoh | -0.01323 | -0.03873 | 1.23E-02  | 0.9584        |
| 1:prukoh-4:parkoh | 0.025092 | -0.00122 | 5.14E-02  | <b>0.0841</b> |
| 2:prukoh-4:parkoh | -0.01152 | -0.03654 | 1.35E-02  | 0.9886        |
| 4:prukoh-4:parkoh | -0.02356 | -0.04916 | 2.05E-03  | <b>0.1190</b> |
| 5:prukoh-4:parkoh | 0.006104 | -0.02337 | 3.56E-02  | 1.0000        |
| 7:prukoh-4:parkoh | -0.01675 | -0.04812 | 1.46E-02  | 0.9452        |
| 6:prukoh-4:parkoh | -0.06372 | -0.10339 | -2.40E-02 | <b>0.0000</b> |
| 7:parkoh-5:parkoh | -0.05478 | -0.0794  | -3.02E-02 | <b>0.0000</b> |
| 6:parkoh-5:parkoh | -0.03746 | -0.06175 | -1.32E-02 | <b>0.0000</b> |
| 3:konpar-5:parkoh | -0.03653 | -0.05511 | -1.79E-02 | <b>0.0000</b> |
| 1:konpar-5:parkoh | -0.01164 | -0.03059 | 7.32E-03  | 0.8233        |
| 2:konpar-5:parkoh | -0.02275 | -0.0416  | -3.91E-03 | <b>0.0031</b> |
| 4:konpar-5:parkoh | -0.02335 | -0.04291 | -3.79E-03 | <b>0.0038</b> |
| 5:konpar-5:parkoh | -0.03015 | -0.05087 | -9.42E-03 | <b>0.0000</b> |
| 7:konpar-5:parkoh | -0.0537  | -0.07486 | -3.25E-02 | <b>0.0000</b> |

|                   |          |          |           |               |
|-------------------|----------|----------|-----------|---------------|
| 6:konpar-5:parkoh | -0.03761 | -0.05982 | -1.54E-02 | <b>0.0000</b> |
| 3:prukoh-5:parkoh | -0.04116 | -0.0641  | -1.82E-02 | <b>0.0000</b> |
| 1:prukoh-5:parkoh | -0.00283 | -0.02667 | 2.10E-02  | 1.0000        |
| 2:prukoh-5:parkoh | -0.03944 | -0.06185 | -1.70E-02 | <b>0.0000</b> |
| 4:prukoh-5:parkoh | -0.05148 | -0.07454 | -2.84E-02 | <b>0.0000</b> |
| 5:prukoh-5:parkoh | -0.02182 | -0.04911 | 5.47E-03  | 0.3364        |
| 7:prukoh-5:parkoh | -0.04467 | -0.074   | -1.53E-02 | <b>0.0000</b> |
| 6:prukoh-5:parkoh | -0.09164 | -0.12971 | -5.36E-02 | <b>0.0000</b> |
| 6:parkoh-7:parkoh | 0.017315 | -0.00999 | 4.46E-02  | 0.7787        |
| 3:konpar-7:parkoh | 0.018246 | -0.00413 | 4.06E-02  | 0.2992        |
| 1:konpar-7:parkoh | 0.043137 | 0.020451 | 6.58E-02  | <b>0.0000</b> |
| 2:konpar-7:parkoh | 0.032021 | 0.009425 | 5.46E-02  | <b>0.0001</b> |
| 4:konpar-7:parkoh | 0.031428 | 0.008233 | 5.46E-02  | <b>0.0003</b> |
| 5:konpar-7:parkoh | 0.02463  | 0.000448 | 4.88E-02  | <b>0.0402</b> |
| 7:konpar-7:parkoh | 0.001077 | -0.02349 | 2.56E-02  | 1.0000        |
| 6:konpar-7:parkoh | 0.017161 | -0.00831 | 4.26E-02  | 0.6787        |
| 3:prukoh-7:parkoh | 0.013617 | -0.01249 | 3.97E-02  | 0.9562        |
| 1:prukoh-7:parkoh | 0.051942 | 0.025044 | 7.88E-02  | <b>0.0000</b> |
| 2:prukoh-7:parkoh | 0.015331 | -0.0103  | 4.10E-02  | 0.8547        |
| 4:prukoh-7:parkoh | 0.003292 | -0.02291 | 2.95E-02  | 1.0000        |
| 5:prukoh-7:parkoh | 0.032954 | 0.002954 | 6.30E-02  | <b>0.0145</b> |
| 7:prukoh-7:parkoh | 0.010102 | -0.02176 | 4.20E-02  | 0.9999        |
| 6:prukoh-7:parkoh | -0.03687 | -0.07693 | 3.19E-03  | 0.1187        |
| 3:konpar-6:parkoh | 0.000931 | -0.02108 | 2.29E-02  | 1.0000        |
| 1:konpar-6:parkoh | 0.025822 | 0.003496 | 4.81E-02  | <b>0.0065</b> |
| 2:konpar-6:parkoh | 0.014706 | -0.00753 | 3.69E-02  | 0.7117        |
| 4:konpar-6:parkoh | 0.014113 | -0.00873 | 3.70E-02  | 0.8152        |
| 5:konpar-6:parkoh | 0.007315 | -0.01653 | 3.12E-02  | 1.0000        |
| 7:konpar-6:parkoh | -0.01624 | -0.04047 | 7.99E-03  | 0.6886        |
| 6:konpar-6:parkoh | -0.00015 | -0.0253  | 2.50E-02  | 1.0000        |
| 3:prukoh-6:parkoh | -0.0037  | -0.02949 | 2.21E-02  | 1.0000        |
| 1:prukoh-6:parkoh | 0.034627 | 0.008032 | 6.12E-02  | <b>0.0007</b> |
| 2:prukoh-6:parkoh | -0.00198 | -0.0273  | 2.33E-02  | 1.0000        |
| 4:prukoh-6:parkoh | -0.01402 | -0.03992 | 1.19E-02  | 0.9374        |
| 5:prukoh-6:parkoh | 0.015639 | -0.01409 | 4.54E-02  | 0.9525        |
| 7:prukoh-6:parkoh | -0.00721 | -0.03882 | 2.44E-02  | 1.0000        |
| 6:prukoh-6:parkoh | -0.05418 | -0.09404 | -1.43E-02 | <b>0.0003</b> |
| 1:konpar-3:konpar | 0.024891 | 0.008963 | 4.08E-02  | <b>0.0000</b> |
| 2:konpar-3:konpar | 0.013775 | -0.00202 | 2.96E-02  | 0.1878        |
| 4:konpar-3:konpar | 0.013182 | -0.00346 | 2.98E-02  | 0.3552        |
| 5:konpar-3:konpar | 0.006384 | -0.01161 | 2.44E-02  | 0.9996        |

|                   |          |          |           |               |
|-------------------|----------|----------|-----------|---------------|
| 7:konpar-3:konpar | -0.01717 | -0.03567 | 1.33E-03  | <b>0.1099</b> |
| 6:konpar-3:konpar | -0.00109 | -0.02077 | 1.86E-02  | 1.0000        |
| 3:prukoh-3:konpar | -0.00463 | -0.02513 | 1.59E-02  | 1.0000        |
| 1:prukoh-3:konpar | 0.033696 | 0.012189 | 5.52E-02  | <b>0.0000</b> |
| 2:prukoh-3:konpar | -0.00291 | -0.02282 | 1.70E-02  | 1.0000        |
| 4:prukoh-3:konpar | -0.01495 | -0.03559 | 5.68E-03  | 0.5369        |
| 5:prukoh-3:konpar | 0.014708 | -0.01057 | 4.00E-02  | 0.8830        |
| 7:prukoh-3:konpar | -0.00814 | -0.03561 | 1.93E-02  | 1.0000        |
| 6:prukoh-3:konpar | -0.05511 | -0.09177 | -1.85E-02 | <b>0.0000</b> |
| 2:konpar-1:konpar | -0.01112 | -0.02735 | 5.12E-03  | 0.6496        |
| 4:konpar-1:konpar | -0.01171 | -0.02877 | 5.35E-03  | 0.6448        |
| 5:konpar-1:konpar | -0.01851 | -0.03689 | -1.26E-04 | <b>0.0461</b> |
| 7:konpar-1:konpar | -0.04206 | -0.06094 | -2.32E-02 | <b>0.0000</b> |
| 6:konpar-1:konpar | -0.02598 | -0.04602 | -5.94E-03 | <b>0.0007</b> |
| 3:prukoh-1:konpar | -0.02952 | -0.05036 | -8.68E-03 | <b>0.0001</b> |
| 1:prukoh-1:konpar | 0.008805 | -0.01303 | 3.06E-02  | 0.9978        |
| 2:prukoh-1:konpar | -0.02781 | -0.04806 | -7.55E-03 | <b>0.0002</b> |
| 4:prukoh-1:konpar | -0.03984 | -0.06082 | -1.89E-02 | <b>0.0000</b> |
| 5:prukoh-1:konpar | -0.01018 | -0.03574 | 1.54E-02  | 0.9982        |
| 7:prukoh-1:konpar | -0.03304 | -0.06076 | -5.31E-03 | <b>0.0039</b> |
| 6:prukoh-1:konpar | -0.08    | -0.11685 | -4.32E-02 | <b>0.0000</b> |
| 4:konpar-2:konpar | -0.00059 | -0.01753 | 1.63E-02  | 1.0000        |
| 5:konpar-2:konpar | -0.00739 | -0.02566 | 1.09E-02  | 0.9977        |
| 7:konpar-2:konpar | -0.03094 | -0.04972 | -1.22E-02 | <b>0.0000</b> |
| 6:konpar-2:konpar | -0.01486 | -0.0348  | 5.08E-03  | 0.4790        |
| 3:prukoh-2:konpar | -0.0184  | -0.03915 | 2.34E-03  | 0.1635        |
| 1:prukoh-2:konpar | 0.019921 | -0.00182 | 4.17E-02  | 0.1233        |
| 2:prukoh-2:konpar | -0.01669 | -0.03684 | 3.46E-03  | 0.2713        |
| 4:prukoh-2:konpar | -0.02873 | -0.0496  | -7.85E-03 | <b>0.0002</b> |
| 5:prukoh-2:konpar | 0.000933 | -0.02454 | 2.64E-02  | 1.0000        |
| 7:prukoh-2:konpar | -0.02192 | -0.04957 | 5.73E-03  | 0.3532        |
| 6:prukoh-2:konpar | -0.06889 | -0.10568 | -3.21E-02 | <b>0.0000</b> |
| 5:konpar-4:konpar | -0.0068  | -0.0258  | 1.22E-02  | 0.9996        |
| 7:konpar-4:konpar | -0.03035 | -0.04984 | -1.09E-02 | <b>0.0000</b> |
| 6:konpar-4:konpar | -0.01427 | -0.03488 | 6.35E-03  | 0.6288        |
| 3:prukoh-4:konpar | -0.01781 | -0.03921 | 3.59E-03  | 0.2622        |
| 1:prukoh-4:konpar | 0.020514 | -0.00184 | 4.29E-02  | 0.1220        |
| 2:prukoh-4:konpar | -0.0161  | -0.03692 | 4.73E-03  | 0.4037        |
| 4:prukoh-4:konpar | -0.02814 | -0.04966 | -6.61E-03 | <b>0.0006</b> |
| 5:prukoh-4:konpar | 0.001526 | -0.02448 | 2.75E-02  | 1.0000        |
| 7:prukoh-4:konpar | -0.02133 | -0.04947 | 6.81E-03  | 0.4444        |

|                   |          |          |           |               |
|-------------------|----------|----------|-----------|---------------|
| 6:prukoh-4:konpar | -0.06829 | -0.10546 | -3.11E-02 | <b>0.0000</b> |
| 7:konpar-5:konpar | -0.02355 | -0.04421 | -2.90E-03 | <b>0.0081</b> |
| 6:konpar-5:konpar | -0.00747 | -0.02919 | 1.43E-02  | 0.9998        |
| 3:prukoh-5:konpar | -0.01101 | -0.03348 | 1.15E-02  | 0.9769        |
| 1:prukoh-5:konpar | 0.027312 | 0.00393  | 5.07E-02  | <b>0.0055</b> |
| 2:prukoh-5:konpar | -0.0093  | -0.03122 | 1.26E-02  | 0.9958        |
| 4:prukoh-5:konpar | -0.02134 | -0.04392 | 1.24E-03  | <b>0.0922</b> |
| 5:prukoh-5:konpar | 0.008324 | -0.01857 | 3.52E-02  | 1.0000        |
| 7:prukoh-5:konpar | -0.01453 | -0.04349 | 1.44E-02  | 0.9705        |
| 6:prukoh-5:konpar | -0.0615  | -0.09928 | -2.37E-02 | <b>0.0000</b> |
| 6:konpar-7:konpar | 0.016084 | -0.00606 | 3.82E-02  | 0.5321        |
| 3:prukoh-7:konpar | 0.01254  | -0.01033 | 3.54E-02  | 0.9299        |
| 1:prukoh-7:konpar | 0.050865 | 0.02709  | 7.46E-02  | <b>0.0000</b> |
| 2:prukoh-7:konpar | 0.014254 | -0.00808 | 3.66E-02  | 0.7695        |
| 4:prukoh-7:konpar | 0.002215 | -0.02077 | 2.52E-02  | 1.0000        |
| 5:prukoh-7:konpar | 0.031877 | 0.004642 | 5.91E-02  | <b>0.0053</b> |
| 7:prukoh-7:konpar | 0.009024 | -0.02025 | 3.83E-02  | 1.0000        |
| 6:prukoh-7:konpar | -0.03794 | -0.07598 | 8.89E-05  | 0.0514        |
| 3:prukoh-6:konpar | -0.00354 | -0.02738 | 2.03E-02  | 1.0000        |
| 1:prukoh-6:konpar | 0.034781 | 0.010074 | 5.95E-02  | <b>0.0001</b> |
| 2:prukoh-6:konpar | -0.00183 | -0.02516 | 2.15E-02  | 1.0000        |
| 4:prukoh-6:konpar | -0.01387 | -0.03782 | 1.01E-02  | 0.8876        |
| 5:prukoh-6:konpar | 0.015793 | -0.01226 | 4.38E-02  | 0.9112        |
| 7:prukoh-6:konpar | -0.00706 | -0.0371  | 2.30E-02  | 1.0000        |
| 6:prukoh-6:konpar | -0.05403 | -0.09265 | -1.54E-02 | <b>0.0001</b> |
| 1:prukoh-3:prukoh | 0.038325 | 0.012961 | 6.37E-02  | <b>0.0000</b> |
| 2:prukoh-3:prukoh | 0.001714 | -0.02231 | 2.57E-02  | 1.0000        |
| 4:prukoh-3:prukoh | -0.01032 | -0.03495 | 1.43E-02  | 0.9964        |
| 5:prukoh-3:prukoh | 0.019338 | -0.0093  | 4.80E-02  | 0.6747        |
| 7:prukoh-3:prukoh | -0.00352 | -0.0341  | 2.71E-02  | 1.0000        |
| 6:prukoh-3:prukoh | -0.05048 | -0.08953 | -1.14E-02 | <b>0.0008</b> |
| 2:prukoh-1:prukoh | -0.03661 | -0.06149 | -1.17E-02 | <b>0.0000</b> |
| 4:prukoh-1:prukoh | -0.04865 | -0.07412 | -2.32E-02 | <b>0.0000</b> |
| 5:prukoh-1:prukoh | -0.01899 | -0.04835 | 1.04E-02  | 0.7487        |
| 7:prukoh-1:prukoh | -0.04184 | -0.0731  | -1.06E-02 | <b>0.0004</b> |
| 6:prukoh-1:prukoh | -0.08881 | -0.12839 | -4.92E-02 | <b>0.0000</b> |
| 4:prukoh-2:prukoh | -0.01204 | -0.03617 | 1.21E-02  | 0.9722        |
| 5:prukoh-2:prukoh | 0.017623 | -0.01058 | 4.58E-02  | 0.8001        |
| 7:prukoh-2:prukoh | -0.00523 | -0.03541 | 2.50E-02  | 1.0000        |
| 6:prukoh-2:prukoh | -0.0522  | -0.09093 | -1.35E-02 | <b>0.0003</b> |
| 5:prukoh-4:prukoh | 0.029662 | 0.000935 | 5.84E-02  | <b>0.0339</b> |

|                   |          |          |           |               |
|-------------------|----------|----------|-----------|---------------|
| 7:prukoh-4:prukoh | 0.006809 | -0.02386 | 3.75E-02  | 1.0000        |
| 6:prukoh-4:prukoh | -0.04016 | -0.07927 | -1.04E-03 | <b>0.0364</b> |
| 7:prukoh-5:prukoh | -0.02285 | -0.05682 | 1.11E-02  | 0.6817        |
| 6:prukoh-5:prukoh | -0.06982 | -0.11157 | -2.81E-02 | <b>0.0000</b> |
| 6:prukoh-7:prukoh | -0.04697 | -0.09008 | -3.86E-03 | <b>0.0164</b> |

Table S3. Summary statistics for anchored assembly. For each cross and for the combined pseudomolecule assembly the number of scaffolds with at least 2 markers, with at least two markers that are > 0.1 cM apart, the combined size of the anchored scaffolds, the N50, and the average coverage are shown per LG.

| LG            | # scaffolds | # scaffolds >= 2 markers | # scaffolds >=2 well-spaced markers | Size (bp) | N50 (bp) | coverage    |
|---------------|-------------|--------------------------|-------------------------------------|-----------|----------|-------------|
| <b>ParKoh</b> |             |                          |                                     |           |          |             |
| 1             | 117         | 21                       | 14                                  | 106312036 | 1301586  | 52.89792    |
| 2             | 89          | 8                        | 4                                   | 59124686  | 886001   | 54.757      |
| 3             | 109         | 14                       | 12                                  | 98715872  | 1184645  | 51.15361    |
| 4             | 49          | 1                        | 1                                   | 39589978  | 1093907  | 54.17022    |
| 5             | 76          | 18                       | 16                                  | 62735740  | 1197186  | 66.5671     |
| 6             | 47          | 7                        | 6                                   | 19057194  | 730017   | 57.78891    |
| 7             | 45          | 6                        | 5                                   | 38543039  | 1485176  | 60.40972    |
| X             | 76          | 4                        | 2                                   | 84017840  | 1519936  | 29.56227    |
| Sum/median    | 608         | 79                       | 60                                  | 508096385 | 1190916  | 53.41334375 |
| <b>KonPar</b> |             |                          |                                     |           |          |             |
| 1             | 128         | 17                       | 13                                  | 103734776 | 1143465  | 37.22859    |
| 2             | 132         | 17                       | 10                                  | 95158272  | 1019600  | 40.18552    |
| 3             | 143         | 22                       | 19                                  | 134318749 | 1355019  | 34.98008    |
| 4             | 109         | 24                       | 12                                  | 110192983 | 1660236  | 40.38131    |
| 5             | 84          | 13                       | 9                                   | 67417874  | 1136159  | 44.86084    |
| 6             | 64          | 7                        | 6                                   | 23922075  | 733389   | 46.43391    |
| 7             | 77          | 17                       | 13                                  | 58701654  | 1180700  | 38.07606    |
| X             | 86          | 14                       | 3                                   | 98541466  | 1540389  | 25.64274    |
| Sum/median    | 823         | 131                      | 85                                  | 691987849 | 1162083  | 38.47363125 |
| <b>PruKoh</b> |             |                          |                                     |           |          |             |
| 1             | 50          | 5                        | 3                                   | 46785714  | 1325001  | 41.55226    |
| 2             | 62          | 4                        | 3                                   | 45819772  | 1106261  | 47.8152     |
| 3             | 57          | 2                        | 2                                   | 54629290  | 1375220  | 40.13577    |
| 4             | 56          | 11                       | 5                                   | 60827800  | 2025849  | 45.12183    |
| 5             | 33          | 3                        | 2                                   | 20743600  | 725518   | 51.94363    |
| 6             | 14          | 0                        | 0                                   | 7779385   | 859092   | 45.60227    |
| 7             | 27          | 4                        | 2                                   | 17783624  | 1224531  | 49.36982    |
| X             | 84          | 9                        | 0                                   | 82253003  | 1268875  | 28.72471    |

|                 |      |     |     |           |         |             |
|-----------------|------|-----|-----|-----------|---------|-------------|
| Sum/median      | 383  | 38  | 17  | 336622188 | 1246703 | 43.78318625 |
| <b>Combined</b> |      |     |     |           |         |             |
| 1               | 167  | 43  | 30  | 117180395 | 1089296 |             |
| 2               | 170  | 29  | 17  | 101876544 | 816734  |             |
| 3               | 175  | 38  | 33  | 137279277 | 1044733 |             |
| 4               | 118  | 36  | 18  | 89703238  | 957048  |             |
| 5               | 102  | 34  | 27  | 62192538  | 880080  |             |
| 6               | 80   | 14  | 12  | 25387579  | 569059  |             |
| 7               | 88   | 27  | 20  | 52742540  | 916807  |             |
| X               | 154  | 27  | 5   | 133989488 | 1249941 |             |
| Sum/median      | 1054 | 248 | 162 | 720351599 | 936928  |             |

Table S4. Integrated AFLP and SNP map for the *L. kohalensis* x *L. paranigra* cross. The highlighted AFLP markers are located under a QTL peak in the Shaw & Lesnick 2009 study. The highlighted AFLP markers on linkage group 1 are markers where a male song and female preference QTL peak co-localize.

| scaffold | locus          | LG | position (cM) | AFLP        | scaffold midpoint position (bp) |
|----------|----------------|----|---------------|-------------|---------------------------------|
| S002761  | S002761_729410 | 1  | 0             | NA          | 106423286                       |
|          | as030          | 1  | 1.821         | PaggaA53    | NA                              |
|          | as074          | 1  | 3.282         | PggacA54    | NA                              |
|          | ac007          | 1  | 6.09          | PagacA52B55 | NA                              |
|          | ac013          | 1  | 7.301         | PcgacA51B51 | NA                              |
|          | ac017          | 1  | 8.604         | PgcacA07B54 | NA                              |
| S000817  | S000817_120415 | 1  | 9.734         | NA          | 114208815                       |
| S002077  | S002077_311803 | 1  | 11.288        | NA          | 109788919                       |
| S007909  | S007909_155126 | 1  | 13.752        | NA          | 104812030                       |
|          | as087          | 1  | 23.642        | PgtgcA54    | NA                              |
|          | as081          | 1  | 25.658        | PgtacA56    | NA                              |
|          | as085_x        | 1  | 30.736        | PgtgcA3     | NA                              |
|          | as080          | 1  | 36.928        | PgtacA55    | NA                              |
|          | as023          | 1  | 38.868        | PaaacA63    | NA                              |
| S001330  | S001330_135948 | 1  | 42.507        | NA          | 100949675                       |
| S001771  | S001771_116507 | 1  | 46.906        | NA          | 105601414                       |
| S000392  | S000392_74030  | 1  | 51.737        | NA          | NA                              |
| S001680  | S001680_315523 | 1  | 52.615        | NA          | 88172650                        |
| S000409  | S000409_474112 | 1  | 53.517        | NA          | 84174036                        |
| S001489  | S001489_769426 | 1  | 56.166        | NA          | 41585373                        |
| S004205  | S004205_29098  | 1  | 57.827        | NA          | 50498860                        |



|         |                 |   |        |             |    |          |
|---------|-----------------|---|--------|-------------|----|----------|
| S000949 | S000949 205067  | 1 | 58.259 | NA          |    | 42520204 |
| S008139 | S008139 68543   | 1 | 58.542 | NA          | NA |          |
| S000696 | S000696 137337  | 1 | 58.549 | NA          | NA |          |
| S002946 | S002946 738803  | 1 | 58.707 | NA          |    | 67349798 |
| C120306 | C120306 385     | 1 | 58.847 | NA          | NA |          |
| S006572 | S006572 95801   | 1 | 58.928 | NA          |    | 46181571 |
| S001914 | S001914 404347  | 1 | 59.118 | NA          |    | 66160290 |
| S009296 | S009296 110864  | 1 | 59.329 | NA          |    | 65039174 |
| S000663 | S000663 611964  | 1 | 59.641 | NA          |    | 53947499 |
| S004747 | S004747 292840  | 1 | 59.784 | NA          |    | 49933664 |
| S000671 | S000671 1033505 | 1 | 61.079 | NA          | NA |          |
| S001489 | S001489 639186  | 1 | 61.694 | NA          |    | 41585373 |
| S004313 | S004313 69835   | 1 | 61.699 | NA          |    | 40812282 |
| S002548 | S002548 423714  | 1 | 62.493 | NA          |    | 45749393 |
| S000105 | S000105 348801  | 1 | 63.591 | NA          |    | 36945493 |
| S004771 | S004771 628132  | 1 | 64.917 | NA          |    | 31081394 |
| S004771 | S004771 1175996 | 1 | 65.21  | NA          |    | 31081394 |
| S002151 | S002151 1377807 | 1 | 66.292 | NA          |    | 22870317 |
|         | as034           | 1 | 68.191 | PatgcA52    | NA |          |
|         | as012           | 1 | 70.107 | PccacA55    | NA |          |
|         | ac014           | 2 | 0      | PgaacA10B60 | NA |          |
| S001206 | S001206 1546586 | 2 | 2.303  | NA          |    | 1821533  |
| S000518 | S000518 766492  | 2 | 6.245  | NA          |    | 6192438  |
|         | as077           | 2 | 26.628 | PgggcA52    | NA |          |
| S003191 | S003191 528616  | 2 | 31.612 | NA          |    | 16874625 |
| S001838 | S001838 6021    | 2 | 42.989 | NA          |    | 23233385 |
| S000416 | S000416 552586  | 2 | 47.133 | NA          |    | 24694735 |
| S004218 | S004218 23553   | 2 | 51.627 | NA          |    | 31927917 |
| S001550 | S001550 214202  | 2 | 52.41  | NA          |    | 33996652 |
| S003798 | S003798 463488  | 2 | 53.5   | NA          |    | 36725738 |
| S002376 | S002376 431585  | 2 | 54.951 | NA          |    | 38303813 |
|         | as052           | 2 | 57.787 | PcggcA53    | NA |          |
| S005289 | S005289 526503  | 2 | 58.474 | NA          |    | 45049140 |
| S000230 | S000230 200879  | 2 | 58.756 | NA          |    | 46073354 |
| S002156 | S002156 413885  | 2 | 61.643 | NA          |    | 90147661 |
| S003079 | S003079 192141  | 2 | 61.705 | NA          |    | 56392065 |
| S004728 | S004728 52289   | 2 | 61.99  | NA          |    | 77439224 |
| S001050 | S001050 43796   | 2 | 62.025 | NA          |    | 71210412 |
| S001881 | S001881 642832  | 2 | 62.193 | NA          |    | 60129008 |
| S003118 | S003118 235274  | 2 | 62.379 | NA          |    | 56724422 |
| S003735 | S003735 82587   | 2 | 62.896 | NA          | NA |          |

|         |                 |   |         |             |    |          |
|---------|-----------------|---|---------|-------------|----|----------|
|         | ac006           | 2 | 63.793  | PacacA56B69 | NA |          |
|         | as040 x         | 2 | 64.823  | PcagcA08    | NA |          |
| S003067 | S003067_20757   | 2 | 67.28   | NA          |    | 80842581 |
| S000199 | S000199_193260  | 2 | 74.457  | NA          |    | 83353553 |
| S001797 | S001797_1827615 | 2 | 75.671  | NA          |    | 85052994 |
| S001855 | S001855_342231  | 2 | 82.018  | NA          |    | 89412353 |
| S004792 | S004792_152639  | 2 | 85.245  | NA          | NA |          |
| S001901 | S001901_315332  | 2 | 87.985  | NA          |    | 94264609 |
| S001602 | S001602_266912  | 2 | 109.791 | NA          |    | 99970919 |
| S000793 | S000793_627068  | 2 | 116.258 | NA          | NA |          |
|         | as115           | 3 | 0       | PttacA54    | NA |          |
|         | as083           | 3 | 3.848   | PgtacA58    | NA |          |
| S001338 | S001338_29965   | 3 | 5.698   | NA          |    | 168668   |
|         | as037           | 3 | 9.753   | PcaacA57    | NA |          |
| S000075 | S000075_156551  | 3 | 11.248  | NA          |    | 1642392  |
| S002528 | S002528_794391  | 3 | 19.911  | NA          |    | 18001031 |
| S009989 | S009989_70944   | 3 | 21.779  | NA          |    | 6045815  |
| S002528 | S002528_794393  | 3 | 23.255  | NA          |    | 18001031 |
| S005403 | S005403_7134    | 3 | 27.914  | NA          |    | 18662141 |
|         | ac009 a         | 3 | 48.316  | PaggcA07B19 | NA |          |
|         | as063           | 3 | 49.481  | PgaacA60    | NA |          |
|         | as064           | 3 | 51.877  | PgaacA61    | NA |          |
|         | as025           | 3 | 53.754  | PaagcA57    | NA |          |
| S000558 | S000558_1959639 | 3 | 59.995  | NA          |    | 40534699 |
| S000558 | S000558_1232157 | 3 | 60.337  | NA          |    | 40534699 |
|         | as088           | 3 | 63.867  | PgtgcA55    | NA |          |
|         | as069           | 3 | 64.465  | PgcacA51    | NA |          |
|         | ad100.as079     | 3 | 65.149  | NA          | NA |          |
| S004777 | S004777_221108  | 3 | 66.442  | NA          |    | 36430961 |
| S000558 | S000558_748836  | 3 | 66.865  | NA          |    | 40534699 |
| S007419 | S007419_788393  | 3 | 67.162  | NA          |    | 42061284 |
| S002934 | S002934_242739  | 3 | 68.016  | NA          |    | 56760880 |
| S003072 | S003072_393178  | 3 | 68.244  | NA          |    | 63064570 |
| S001785 | S001785_133632  | 3 | 68.301  | NA          |    | 60906412 |
| S000726 | S000726_1782089 | 3 | 68.399  | NA          |    | 48678466 |
| S000529 | S000529_530363  | 3 | 68.572  | NA          |    | 72186930 |
|         | as108 a         | 3 | 68.59   | PtgacA03    | NA |          |
| S002665 | S002665_282741  | 3 | 68.951  | NA          | NA |          |
| S005483 | S005483_46807   | 3 | 69.079  | NA          |    | 62650842 |
| S013086 | S013086_40139   | 3 | 69.12   | NA          | NA |          |
| S002194 | S002194_96231   | 3 | 69.157  | NA          |    | 66669112 |

|         |                 |   |        |          |           |
|---------|-----------------|---|--------|----------|-----------|
| S006750 | S006750 274965  | 3 | 69.245 | NA       | NA        |
| S004654 | S004654 237626  | 3 | 69.303 | NA       | NA        |
| S002002 | S002002 376411  | 3 | 69.412 | NA       | 44975632  |
| S003472 | S003472 9538    | 3 | 70.555 | NA       | 82404642  |
| S002613 | S002613 31096   | 3 | 71.526 | NA       | NA        |
| S001060 | S001060 728231  | 3 | 72.259 | NA       | 89191537  |
| S002297 | S002297 775779  | 3 | 72.322 | NA       | 91133138  |
| S001060 | S001060 1929755 | 3 | 72.461 | NA       | 89191537  |
| S006865 | S006865 338439  | 3 | 72.867 | NA       | 101275163 |
|         | as101           | 3 | 73.62  | PtcgcA09 | NA        |
| S001265 | S001265 211884  | 3 | 74.555 | NA       | 106649134 |
| S000385 | S000385 1480834 | 3 | 75.848 | NA       | 108764126 |
| S001106 | S001106 481878  | 3 | 82.071 | NA       | 114989880 |
|         | as114 ax        | 3 | 86.713 | PttacA02 | NA        |
| S001275 | S001275 1127865 | 3 | 88.98  | NA       | 122746700 |
| S002311 | S002311 254807  | 3 | 89.321 | NA       | 123571440 |
|         | as076 a         | 4 | 0      | PgggcA01 | NA        |
|         | as073 a         | 4 | 1.753  | PggacA01 | NA        |
| S005844 | S005844 224400  | 4 | 18.591 | NA       | 4097279   |
|         | as117 a         | 4 | 41.053 | PttacA06 | NA        |
|         | as099           | 4 | 41.551 | PtcacA54 | NA        |
| S001783 | S001783 279356  | 4 | 43.04  | NA       | 63112104  |
| S000590 | S000590 1997032 | 4 | 43.249 | NA       | 29331168  |
| S014891 | S014891 36875   | 4 | 43.589 | NA       | NA        |
| S003206 | S003206 599818  | 4 | 43.711 | NA       | NA        |
| S000836 | S000836 228275  | 4 | 43.801 | NA       | NA        |
| S000679 | S000679 623688  | 4 | 43.895 | NA       | 57825201  |
|         | as075 a         | 4 | 44.445 | PggacA13 | NA        |
| S002196 | S002196 584574  | 4 | 44.674 | NA       | 42514727  |
| S001005 | S001005 1065597 | 4 | 44.857 | NA       | 39878575  |
| S003635 | S003635 7993    | 4 | 45.443 | NA       | 63978342  |
| S009873 | S009873 154713  | 4 | 49.074 | NA       | 71866807  |
| S002058 | S002058 706797  | 4 | 49.408 | NA       | 72523035  |
| S000455 | S000455 692625  | 4 | 52.283 | NA       | 73544308  |
|         | as029 a         | 4 | 61.5   | PagacA5  | NA        |
| S001486 | S001486 61579   | 4 | 64.17  | NA       | 77623428  |
|         | as028 x         | 4 | 65.829 | PagacA1  | NA        |
| S001279 | S001279 277406  | 4 | 67.269 | NA       | 78135382  |
| S001608 | S001608 399358  | 4 | 83.462 | NA       | 89198891  |
|         | as021           | 5 | 0      | PaaacA54 | NA        |
| S005326 | S005326 57790   | 5 | 1.807  | NA       | 466530    |

|         |                |   |        |             |          |
|---------|----------------|---|--------|-------------|----------|
|         | ac016          | 5 | 2.394  | PgagcA56B62 | NA       |
|         | ac011          | 5 | 4.24   | PcagcA52B53 | NA       |
|         | ac015          | 5 | 5.865  | PgaacA62B66 | NA       |
|         | as116 a        | 5 | 7.016  | PttacA05    | NA       |
| S002190 | S002190 273188 | 5 | 13.671 | NA          | 3452268  |
|         | as100          | 5 | 15.717 | PtcgcA54    | NA       |
| S000809 | S000809 365747 | 5 | 19.221 | NA          | 6005121  |
|         | as066 a        | 5 | 21.423 | PgagcA08    | NA       |
|         | as027 a        | 5 | 25.245 | PacacA06    | NA       |
|         | ad082.as062    | 5 | 26.337 | NA          | NA       |
|         | as045          | 5 | 27.055 | PccacA53    | NA       |
| S004462 | S004462 54127  | 5 | 28.207 | NA          | 13078451 |
| S005610 | S005610 84211  | 5 | 28.338 | NA          | 13179099 |
| S000366 | S000366 42046  | 5 | 28.803 | NA          | 17964325 |
| S000745 | S000745 339612 | 5 | 30.425 | NA          | 21039003 |
| S002565 | S002565 116928 | 5 | 33.166 | NA          | 22902902 |
| S004683 | S004683 48328  | 5 | 34.768 | NA          | 24389284 |
| S006506 | S006506 7146   | 5 | 35.301 | NA          | 27839633 |
| S005519 | S005519 111372 | 5 | 37.975 | NA          | 32385211 |
| S000305 | S000305 70577  | 5 | 40.26  | NA          | 33073185 |
| S000979 | S000979 164421 | 5 | 41.485 | NA          | 35633669 |
| S005459 | S005459 70152  | 5 | 42.698 | NA          | 37847956 |
| S000180 | S000180 656202 | 5 | 44.503 | NA          | 40272446 |
| S021890 | S021890 296    | 5 | 45.368 | NA          | 42534517 |
|         | as068          | 5 | 46.655 | PgagcA51    | NA       |
| S005334 | S005334 732385 | 5 | 48.033 | NA          | 43080568 |
| S005064 | S005064 175253 | 5 | 49.954 | NA          | 45035858 |
|         | as091          | 5 | 52.052 | PtaacA51    | NA       |
| S003838 | S003838 738497 | 5 | 54.849 | NA          | 46738481 |
| S001560 | S001560 398299 | 5 | 59.376 | NA          | 50508185 |
| S004681 | S004681 23198  | 5 | 61.431 | NA          | 53592894 |
|         | as057          | 5 | 62.937 | PctacA55    | NA       |
|         | as058          | 5 | 63.812 | PctacA56    | NA       |
|         | as059          | 5 | 65.211 | PctacA57    | NA       |
|         | as043          | 5 | 71.183 | PcagcA51    | NA       |
|         | as118 x        | 5 | 72.676 | PttacA13    | NA       |
|         | as041          | 5 | 73.969 | PcagcA56    | NA       |
| S007270 | S007270 308120 | 5 | 76.332 | NA          | 58235091 |
| S002503 | S002503 741242 | 5 | 77.495 | NA          | 58956874 |
|         | as110          | 6 | 0      | PtggcA52    | NA       |
|         | as047 x        | 6 | 1.51   | PcgacA02    | NA       |

|         |                 |   |        |             |    |          |
|---------|-----------------|---|--------|-------------|----|----------|
| S001034 | S001034_78522   | 6 | 2.72   | NA          |    | 24400658 |
| S022584 | S022584_1139    | 6 | 5.895  | NA          |    | 23964288 |
|         | as105           | 6 | 6.664  | PtgacA58    | NA |          |
| S005236 | S005236_14409   | 6 | 7.404  | NA          |    | 16442306 |
| S001507 | S001507_262717  | 6 | 8.078  | NA          |    | 13978219 |
| S002799 | S002799_37080   | 6 | 10.159 | NA          |    | 22063251 |
|         | ac003           | 6 | 11.251 | PaagcA61B63 | NA |          |
|         | ac019           | 6 | 13.745 | PtgacA57B60 | NA |          |
| S001904 | S001904_134885  | 6 | 15.337 | NA          |    | 16620760 |
|         | as109           | 6 | 17.735 | PtgacA56    | NA |          |
|         | as039           | 6 | 20.554 | PcagcA54    | NA |          |
| S000218 | S000218_4280    | 6 | 21.865 | NA          |    | 10002544 |
| S001761 | S001761_1745572 | 6 | 27.303 | NA          |    | 6635712  |
| S005439 | S005439_103276  | 6 | 35.966 | NA          |    | 4315651  |
| S011721 | S011721_76537   | 6 | 47.364 | NA          |    | 849742   |
| S003103 | S003103_949190  | 7 | 0      | NA          |    | 1904957  |
| S008107 | S008107_29859   | 7 | 3.613  | NA          |    | 2842152  |
| S003103 | S003103_1019194 | 7 | 3.994  | NA          |    | 1904957  |
| S000557 | S000557_589404  | 7 | 7.085  | NA          |    | 3829489  |
| S002304 | S002304_728504  | 7 | 9.873  | NA          |    | 4666925  |
| S002736 | S002736_346176  | 7 | 10.997 | NA          |    | 5494164  |
| S002736 | S002736_115345  | 7 | 12.279 | NA          |    | 5494164  |
| S014172 | S014172_53634   | 7 | 13.346 | NA          |    | 5971292  |
| S000628 | S000628_1159720 | 7 | 17.535 | NA          |    | 8386281  |
| S000628 | S000628_169050  | 7 | 18.732 | NA          |    | 8386281  |
|         | as033           | 7 | 21.278 | PatacA55    | NA |          |
|         | as071_a         | 7 | 22.74  | PgcgcA11    | NA |          |
| S000677 | S000677_527760  | 7 | 24.152 | NA          |    | 12625625 |
|         | as070_a         | 7 | 26.358 | PgcacA10    | NA |          |
| S002087 | S002087_530732  | 7 | 44.525 | NA          |    | 31673319 |
| S004909 | S004909_906373  | 7 | 50.728 | NA          |    | 39335421 |
| S010292 | S010292_145463  | 7 | 53.418 | NA          |    | 40115847 |
| S004220 | S004220_129736  | 7 | 53.983 | NA          |    | 43031005 |
| S001469 | S001469_584893  | 7 | 65.118 | NA          |    | 50836753 |
| S002493 | S002493_175861  | 7 | 67.129 | NA          |    | 48491131 |
|         | xs032_x         | X | 0      | PttacA04    | NA |          |
| S000571 | S000571_30159   | X | 2.403  | NA          |    | 4915702  |
|         | xd024           | X | 11.115 | PtagcB55    | NA |          |
| S001780 | S001780_509180  | X | 24.446 | NA          |    | 10902308 |
|         | xd004           | X | 25.132 | PatacB52    | NA |          |
|         | xs020           | X | 29.168 | PatgcA56    | NA |          |

|         |                 |   |         |          |    |           |
|---------|-----------------|---|---------|----------|----|-----------|
| S000766 | S000766 827724  | X | 30.52   | NA       |    | 11869181  |
| S000360 | S000360 70566   | X | 32.459  | NA       |    | 17072014  |
| S003455 | S003455 1122569 | X | 35.526  | NA       |    | 19186595  |
| S004887 | S004887 81621   | X | 42.013  | NA       | NA |           |
|         | xs024 x         | X | 43.011  | PcggcA10 | NA |           |
| S000604 | S000604 43741   | X | 43.459  | NA       | NA |           |
| S000648 | S000648 2315784 | X | 44.883  | NA       |    | 34819414  |
| S000219 | S000219 2024096 | X | 45.729  | NA       |    | 26925418  |
| S000777 | S000777 1339236 | X | 46.733  | NA       |    | 30344332  |
| S000777 | S000777 461461  | X | 46.887  | NA       |    | 30344332  |
| S000648 | S000648 2255296 | X | 47.453  | NA       |    | 34819414  |
| S001873 | S001873 641123  | X | 49.384  | NA       |    | 36757980  |
|         | xd016 x         | X | 49.672  | PatgcB02 | NA |           |
| S001241 | S001241 171252  | X | 53.266  | NA       |    | 44632865  |
| S003053 | S003053 264327  | X | 55.937  | NA       |    | 56937852  |
| S000327 | S000327 278424  | X | 56.293  | NA       |    | 55828014  |
| S000470 | S000470 76715   | X | 56.911  | NA       |    | 59714238  |
|         | xd008 x         | X | 57.404  | PgggcB22 | NA |           |
| S003307 | S003307 279141  | X | 57.747  | NA       |    | 63486064  |
| S001912 | S001912 587919  | X | 58.069  | NA       |    | 62108629  |
| S000965 | S000965 1228070 | X | 59.663  | NA       |    | 73444967  |
| S000808 | S000808 1583160 | X | 59.672  | NA       |    | 69248171  |
| S006304 | S006304 697561  | X | 59.908  | NA       | NA |           |
| S013985 | S013985 11114   | X | 60.241  | NA       |    | 82920002  |
|         | xd020           | X | 63.263  | PcggcB53 | NA |           |
| S007907 | S007907 144642  | X | 64.648  | NA       |    | 94604867  |
|         | xs011           | X | 67.511  | PaaacA60 | NA |           |
| S001930 | S001930 1745657 | X | 68.641  | NA       |    | 88122926  |
| S001930 | S001930 2410442 | X | 69.247  | NA       |    | 88122926  |
| S004832 | S004832 609791  | X | 70.344  | NA       |    | 91521965  |
| S001247 | S001247 68215   | X | 71.108  | NA       |    | 92776928  |
|         | xs012           | X | 75.227  | PaagcA53 | NA |           |
| S000238 | S000238 1169086 | X | 90.242  | NA       |    | 113789231 |
| S003071 | S003071 613045  | X | 95.05   | NA       |    | 116953618 |
| S002737 | S002737 694631  | X | 117.43  | NA       | NA |           |
| S000176 | S000176 35913   | X | 126.585 | NA       |    | 132559092 |
| S001187 | S001187 211572  | X | 130.879 | NA       |    | 127829472 |
| S003230 | S003230 1425064 | X | 131.437 | NA       |    | 129558233 |
| S002008 | S002008 1089204 | X | 131.468 | NA       |    | 126707516 |

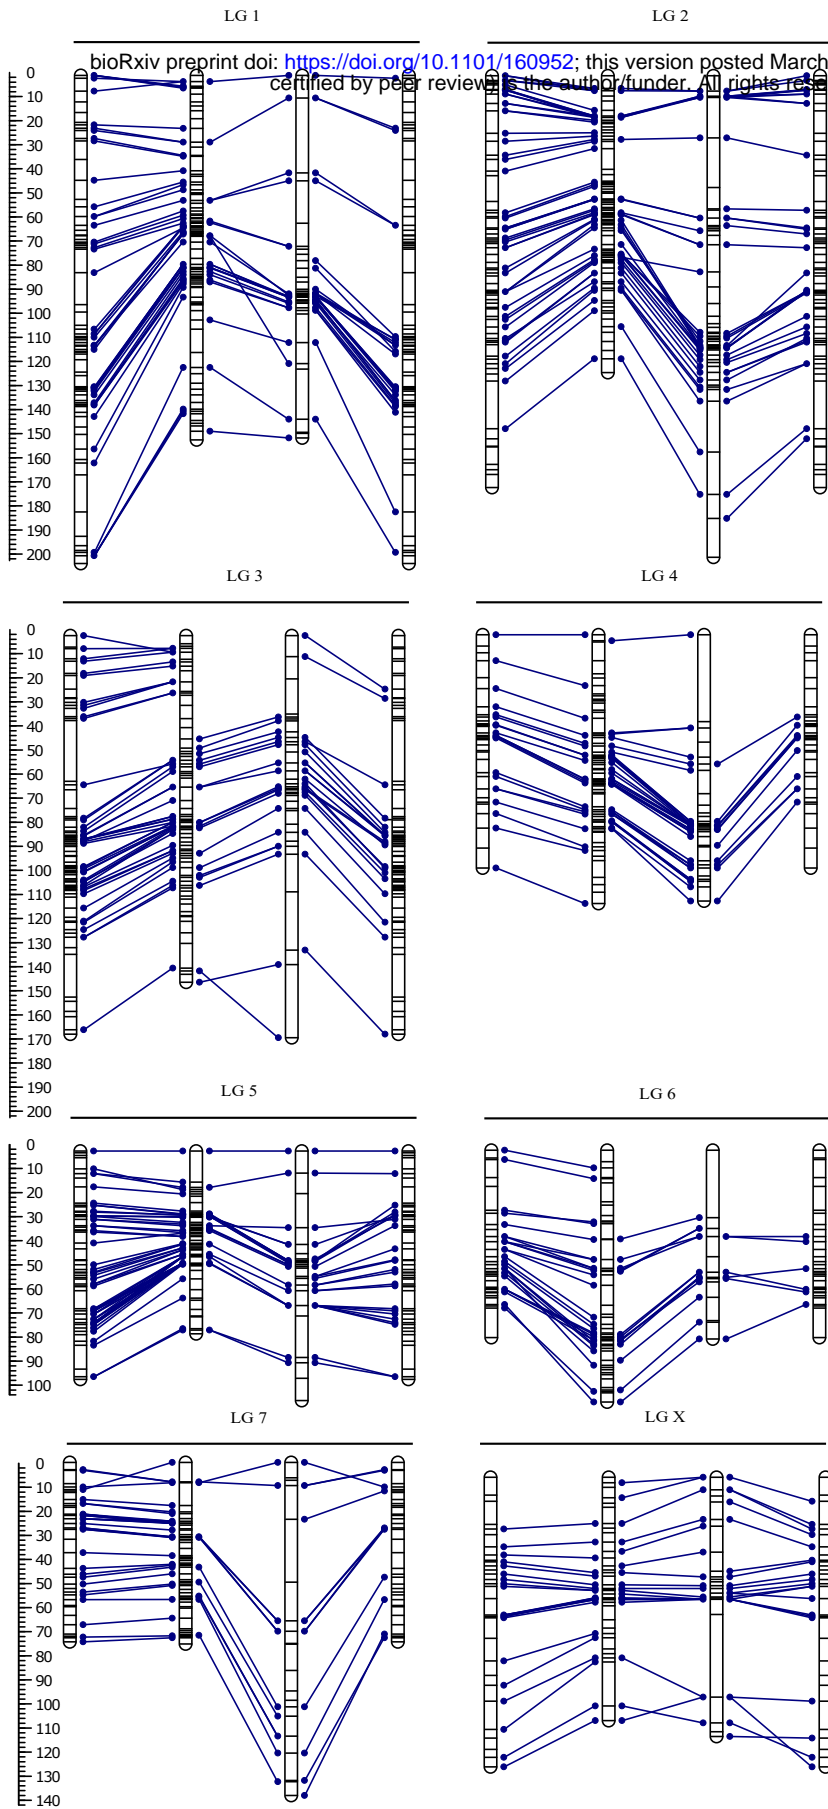

Figure S1. Comprehensive linkage maps. Bars represent linkage groups (LG) for ParKoh, KonPar, and PruKoh. Lines within the bars indicate marker positions. The scale on the left gives marker position in cM. Blue lines connect markers on the same scaffold between the different maps (homologous markers). The map for ParKoh is shown twice to facilitate comparisons across all three maps.



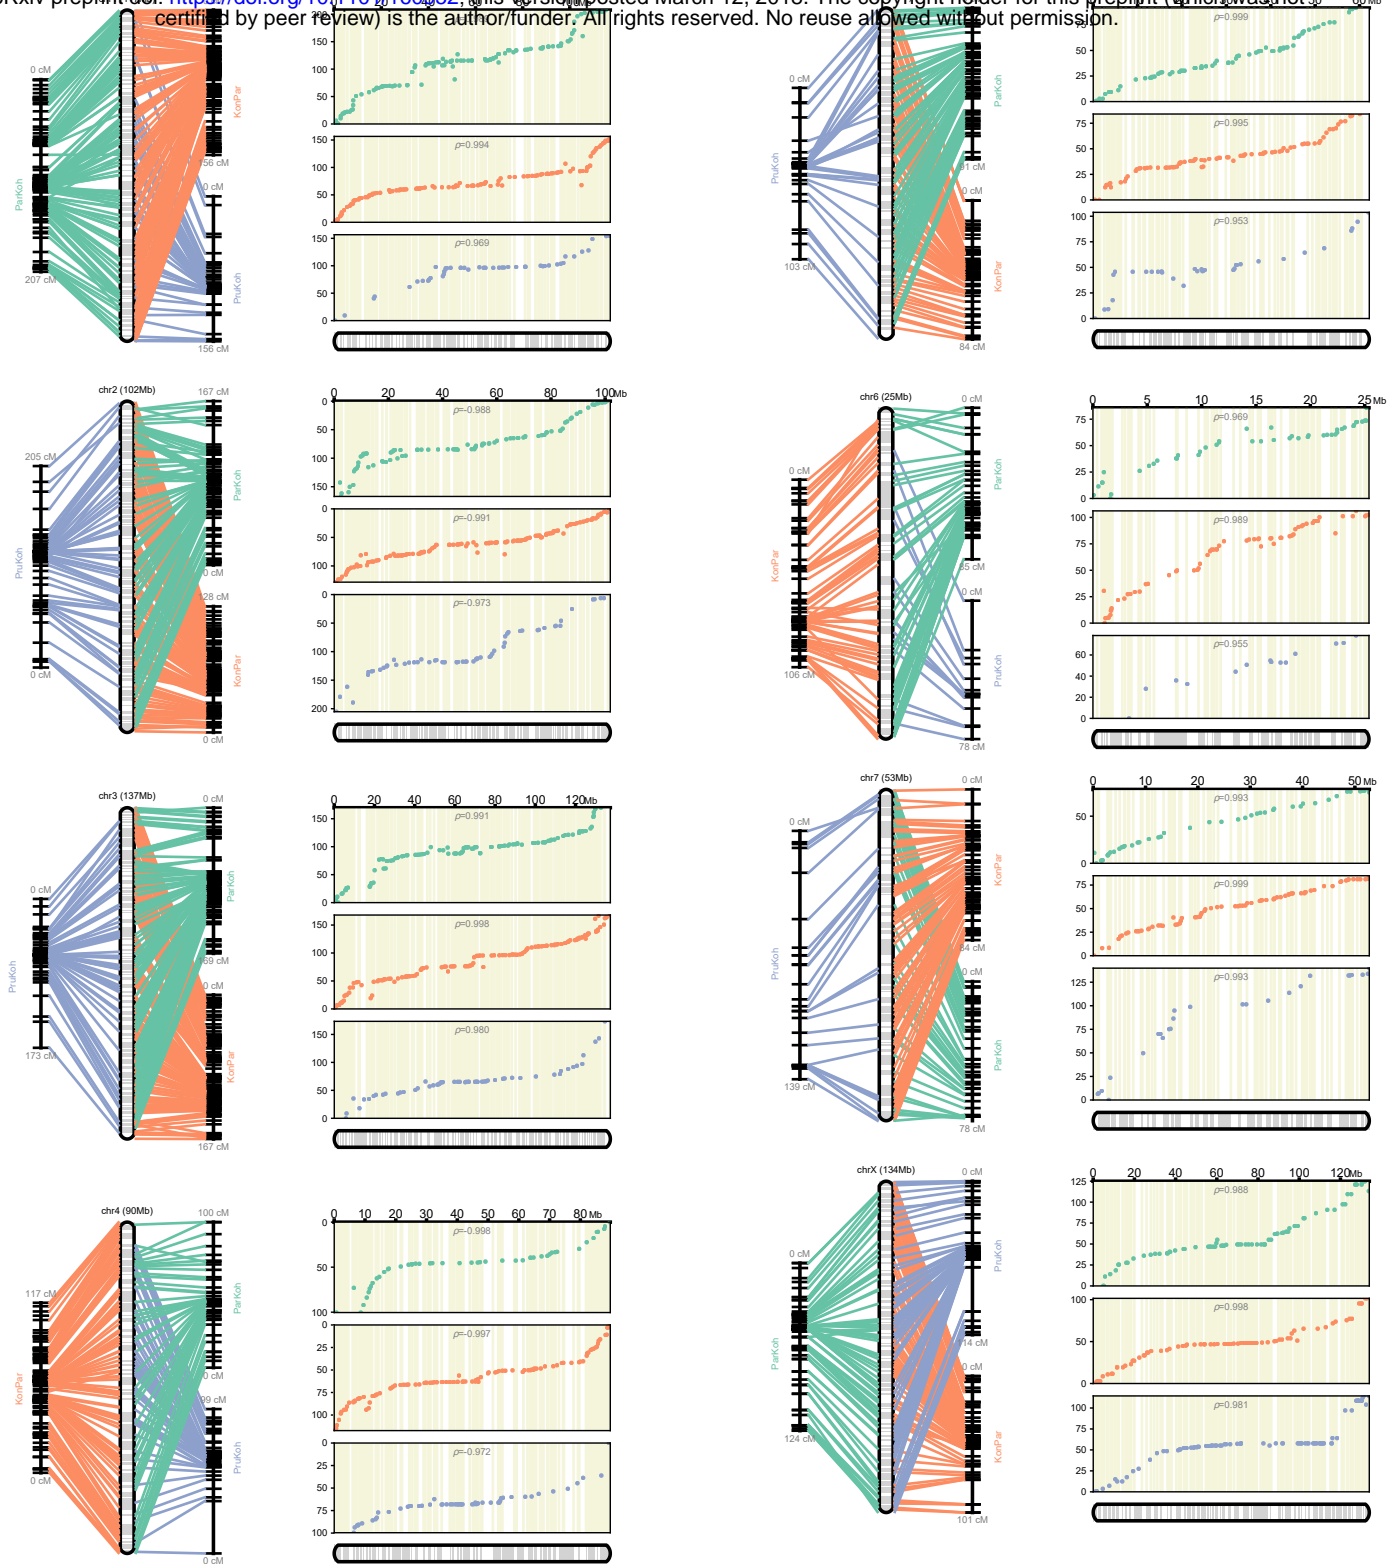

Figure S2. ALLMAPS output. For each of the linkage groups (chr) the relative order with respect to the shared map (i.e. the pseudomolecule assembly) is shown as well as Spearman's rho ( $\rho$ ) for the strength of correlation between marker orders.



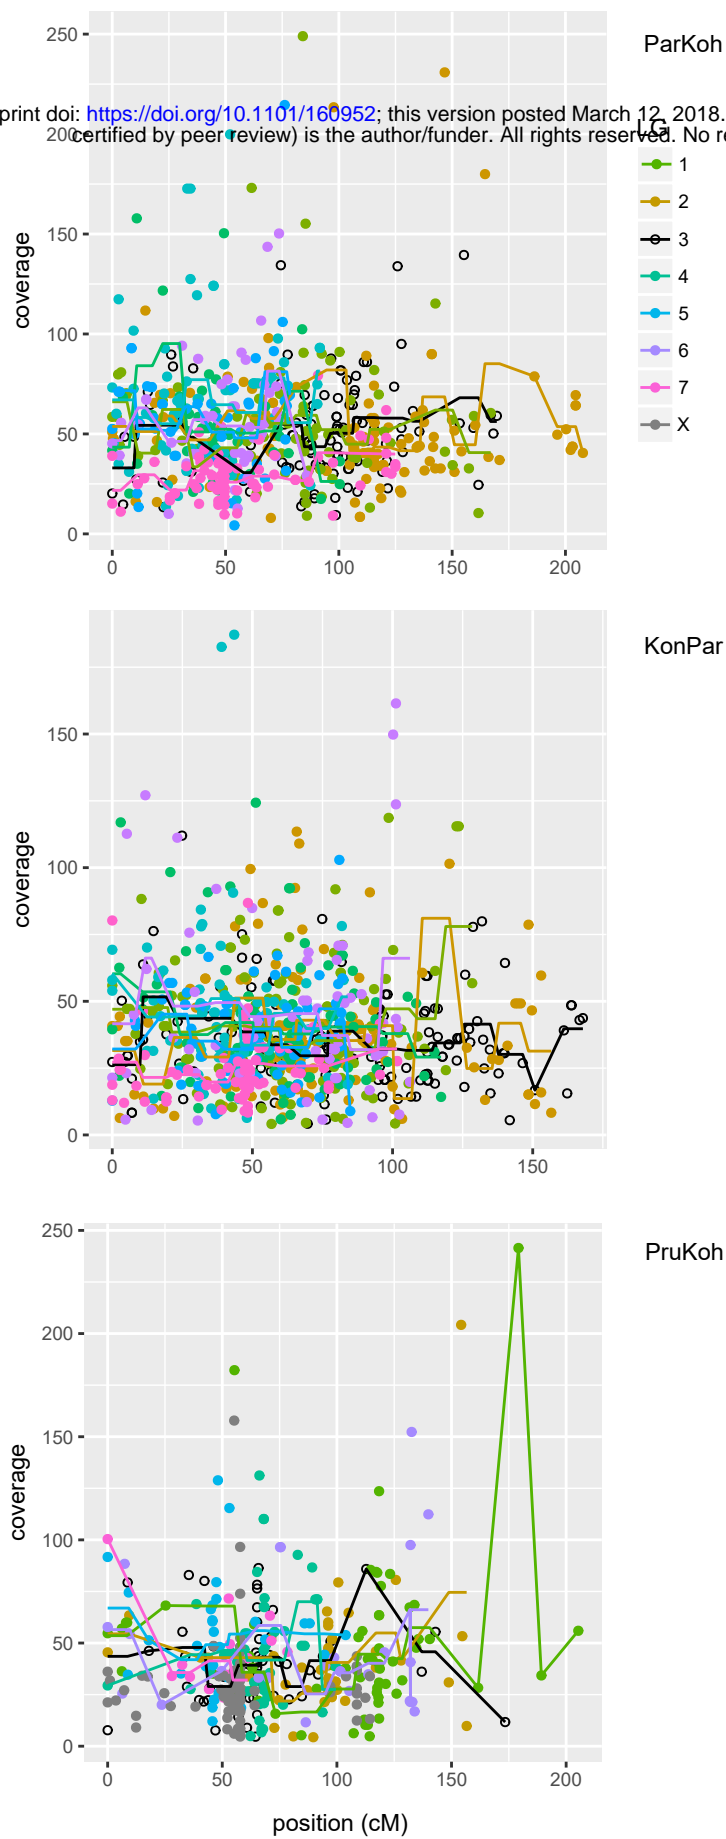

Figure S3. Coverage per cross per linkage group. For each of the three linkage maps (ParKoh, KonPar, PruKoh) the variation in coverage across the 8 linkage groups is shown. Coverage is calculated as the average (across individuals) read count per marker (points). Solid lines show 10-cM non-sliding window averages.
